# Supplementary material for: Polyketides from the Mangrove-Derived Endophytic Fungus Cladosporium cladosporioides
Source: PubMed Central journal article supplement (PMC6563031; doi:10.3390/md17050296), 2019-05-17

## Supplementary Material

# Polyketides from the Mangrove-Derived Endophytic Fungus *Cladosporium cladosporioides*

Fan-Zhong Zhang<sup>1,2,3</sup>, Xiao-Ming Li<sup>1,2</sup>, Xin Li<sup>1,2</sup>, Sui-qunYang<sup>1,2</sup>, Ling-Hong Meng<sup>\*,1,2</sup>, and Bin-Gui Wang<sup>\*,1,2,3</sup>

- <sup>1</sup> Key Laboratory of Experimental Marine Biology, Center for Ocean Mega-Science, Institute of Oceanology, Chinese Academy of Sciences, Nanhai Road 7, Qingdao 266071, People's Republic of China; E-Mails: fancyzfh@163.com (F.-Z.Z.); lixmqdio@126.com (X.-M.L.); lixin871014@163.com (X.L.); suiqunyang@163.com (S.-Q.Y.)
- <sup>2</sup> Laboratory of Marine Biology and Biotechnology, Qingdao National Laboratory for Marine Science and Technology, Wenhai Road 1, Qingdao 266237, People's Republic of China
- <sup>3</sup> University of Chinese Academy of Sciences, Yuquan Road 19A, Beijing 100049, People's Republic of China

### Corresponding Author

\* Phone (B.-G. Wang): +86-532-82898553. E-mail: m8545303@163.com (L.-H.M.); wangbg@ms.qdio.ac.cn. (B.-G. Wang);

## Content

- Figure S1.** HRESI mass spectrum of compound **1**;
- Figure S2.**  $^1\text{H}$  NMR (600 MHz,  $\text{DMSO-}d_6$ ) spectrum of compound **1**;
- Figure S3.**  $^1\text{H}$  NMR (500 MHz,  $\text{DMSO-}d_6$ ) spectrum of compound **1**;
- Figure S4.**  $^{13}\text{C}$  NMR (125 MHz,  $\text{DMSO-}d_6$ ) and DEPT spectra of compound **1**;
- Figure S5.** COSY spectrum of compound **1**;
- Figure S6.** HSQC spectrum of compound **1**;
- Figure S7.** HMBC spectrum of compound **1**;
- Figure S8.** NOESY spectrum of compound **1**;
- Figure S9.**  $^1\text{H}$  NMR (500 MHz,  $\text{DMSO-}d_6$ ) spectrum of (*S*)-MTPA ester (**1a**);
- Figure S10.**  $^1\text{H}$  NMR (500 MHz,  $\text{DMSO-}d_6$ ) spectrum of (*R*)-MTPA ester (**1b**);
- Figure S11.** HRESI mass spectrum of compound **2**;
- Figure S12.**  $^1\text{H}$  NMR (500 MHz,  $\text{DMSO-}d_6$ ) spectrum of compound **2**;
- Figure S13.**  $^{13}\text{C}$  NMR (125 MHz,  $\text{DMSO-}d_6$ ) and DEPT spectra of compound **2**;
- Figure S14.** COSY spectrum of compound **2**;
- Figure S15.** HSQC spectrum of compound **2**;
- Figure S16.** HMBC spectrum of compound **2**;
- Figure S17.** NOESY spectrum of compound **2**;
- Figure S18.** HRESI mass spectrum of compound **3**;
- Figure S19.**  $^1\text{H}$  NMR (500 MHz,  $\text{DMSO-}d_6$ ) spectrum of compound **3**;
- Figure S20.**  $^1\text{H}$  NMR (500 MHz,  $\text{CDCl}_3$ ) spectrum of compound **3**;
- Figure S21.**  $^{13}\text{C}$  NMR (125 MHz,  $\text{DMSO-}d_6$ ) and DEPT spectra of compound **3**;
- Figure S22.**  $^{13}\text{C}$  NMR (125 MHz,  $\text{CDCl}_3$ ) and DEPT spectra of compound **3**;
- Figure S23.** COSY spectrum of compound **3**;
- Figure S24.** HSQC spectrum of compound **3**;
- Figure S25.** HMBC spectrum of compound **3**;
- Figure S26.** ECD spectrum of compound **3**;
- Figure S27.** HRESI mass spectrum of compound **4**;
- Figure S28.**  $^1\text{H}$  NMR (500 MHz,  $\text{DMSO-}d_6$ ) spectrum of compound **4**;
- Figure S29.**  $^{13}\text{C}$  NMR (125 MHz,  $\text{DMSO-}d_6$ ) and DEPT spectra of compound **4**;
- Figure S30.** COSY spectrum of compound **4**;
- Figure S31.** HSQC spectrum of compound **4**;
- Figure S32.** HMBC spectrum of compound **4**;

**Figure S33.** ECD spectrum of compound **4**;  
**Figure S34.** HRESI mass spectrum of compound **5**;  
**Figure S35.**  $^1\text{H}$  NMR (500 MHz,  $\text{DMSO-}d_6$ ) spectrum of compound **5**;  
**Figure S36.**  $^{13}\text{C}$  NMR (125 MHz,  $\text{DMSO-}d_6$ ) and DEPT spectra of compound **5**;  
**Figure S37.** COSY spectrum of compound **5**;  
**Figure S38.** HSQC spectrum of compound **5**;  
**Figure S39.** HMBC spectrum of compound **5**;  
**Figure S40.** NOESY spectrum of compound **5**;  
**Figure S41.** HRESI mass spectrum of compound **6**;  
**Figure S42.**  $^1\text{H}$  NMR (500 MHz,  $\text{DMSO-}d_6$ ) spectrum of compound **6**;  
**Figure S43.**  $^{13}\text{C}$  NMR (125 MHz,  $\text{DMSO-}d_6$ ) and DEPT spectra of compound **6**;  
**Figure S44.** COSY spectrum of compound **6**;  
**Figure S45.** HMBC spectrum of compound **6**;  
**Figure S46.** Crystal packing of compound **3**;  
**Figure S47.** Crystal packing of compound **6**.

**Figure S1.** HRESI mass spectrum of compound **1**;

20171102-MA299-35\_171102100116 #83-85 RT: 0.67-0.68 AV: 3 NL: 7.23E6  
T: FTMS + p ESI Full ms [150.00-1000.00]

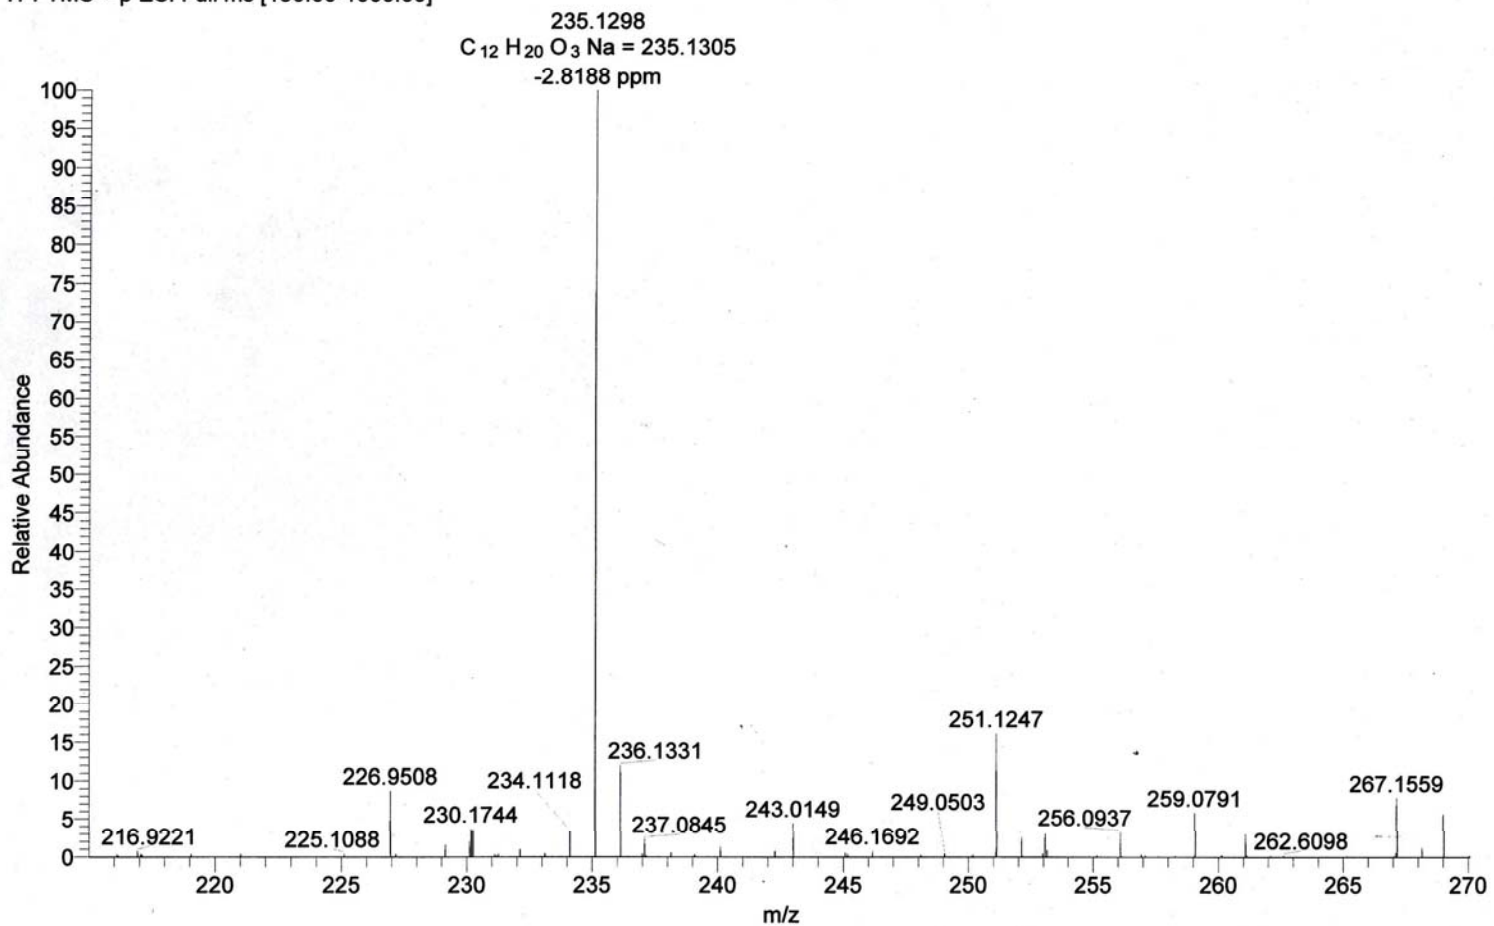

**Figure S2.**  $^1\text{H}$  NMR (600 MHz,  $\text{DMSO-}d_6$ ) spectrum of compound **1**;

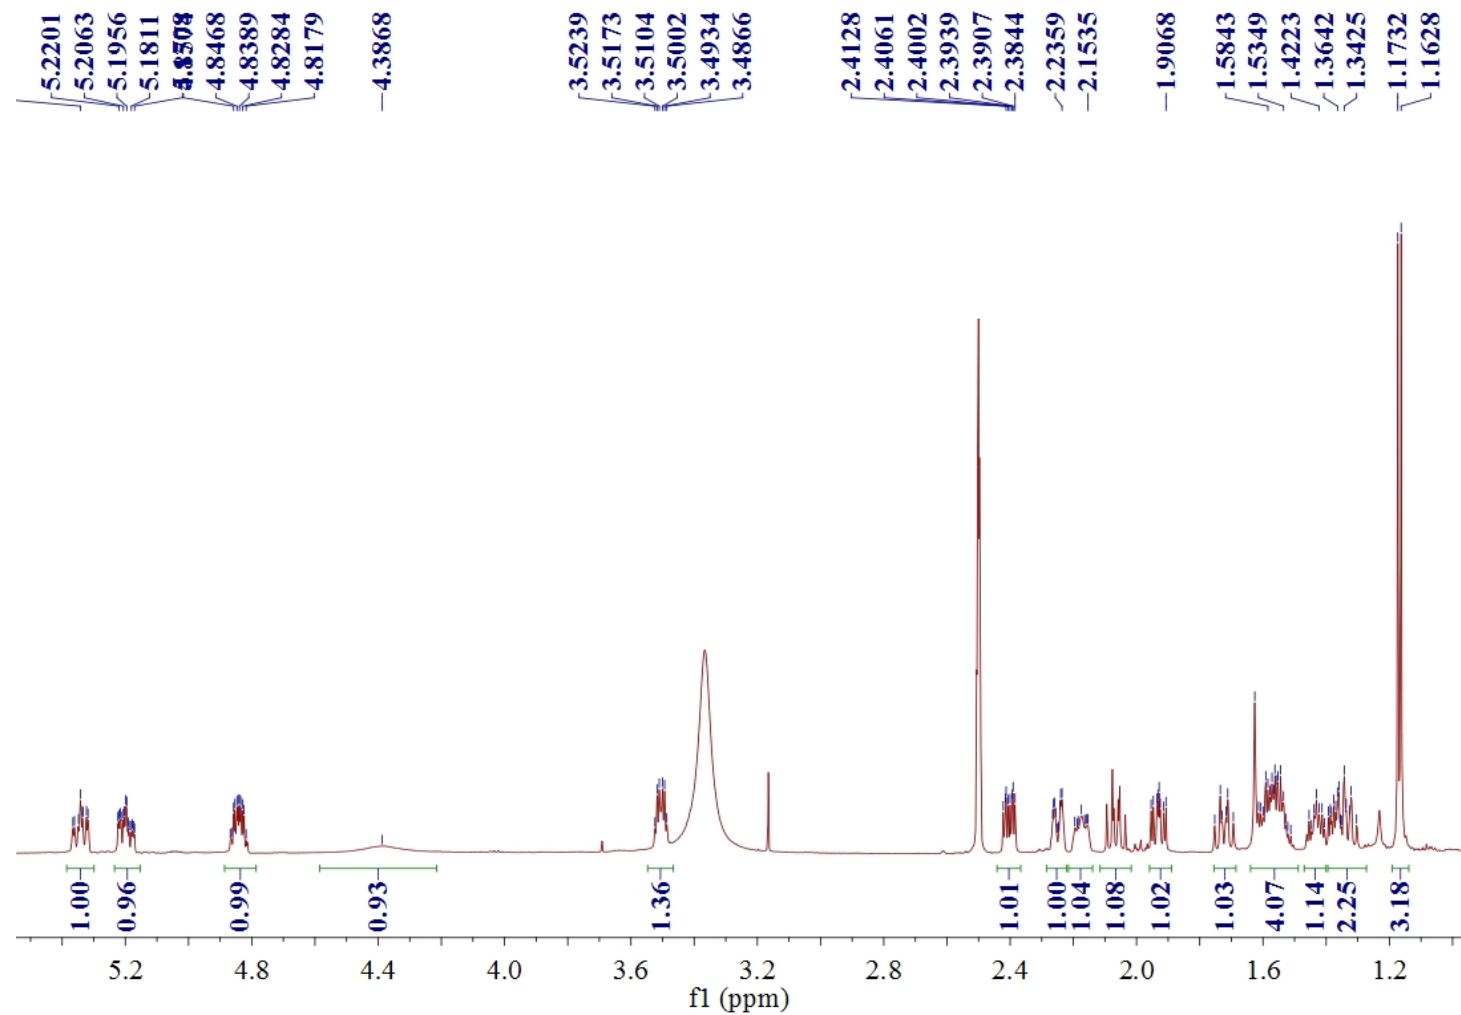

**Figure S3.**  $^1\text{H}$  NMR (500 MHz,  $\text{DMSO-}d_6$ ) spectrum of compound **1**;

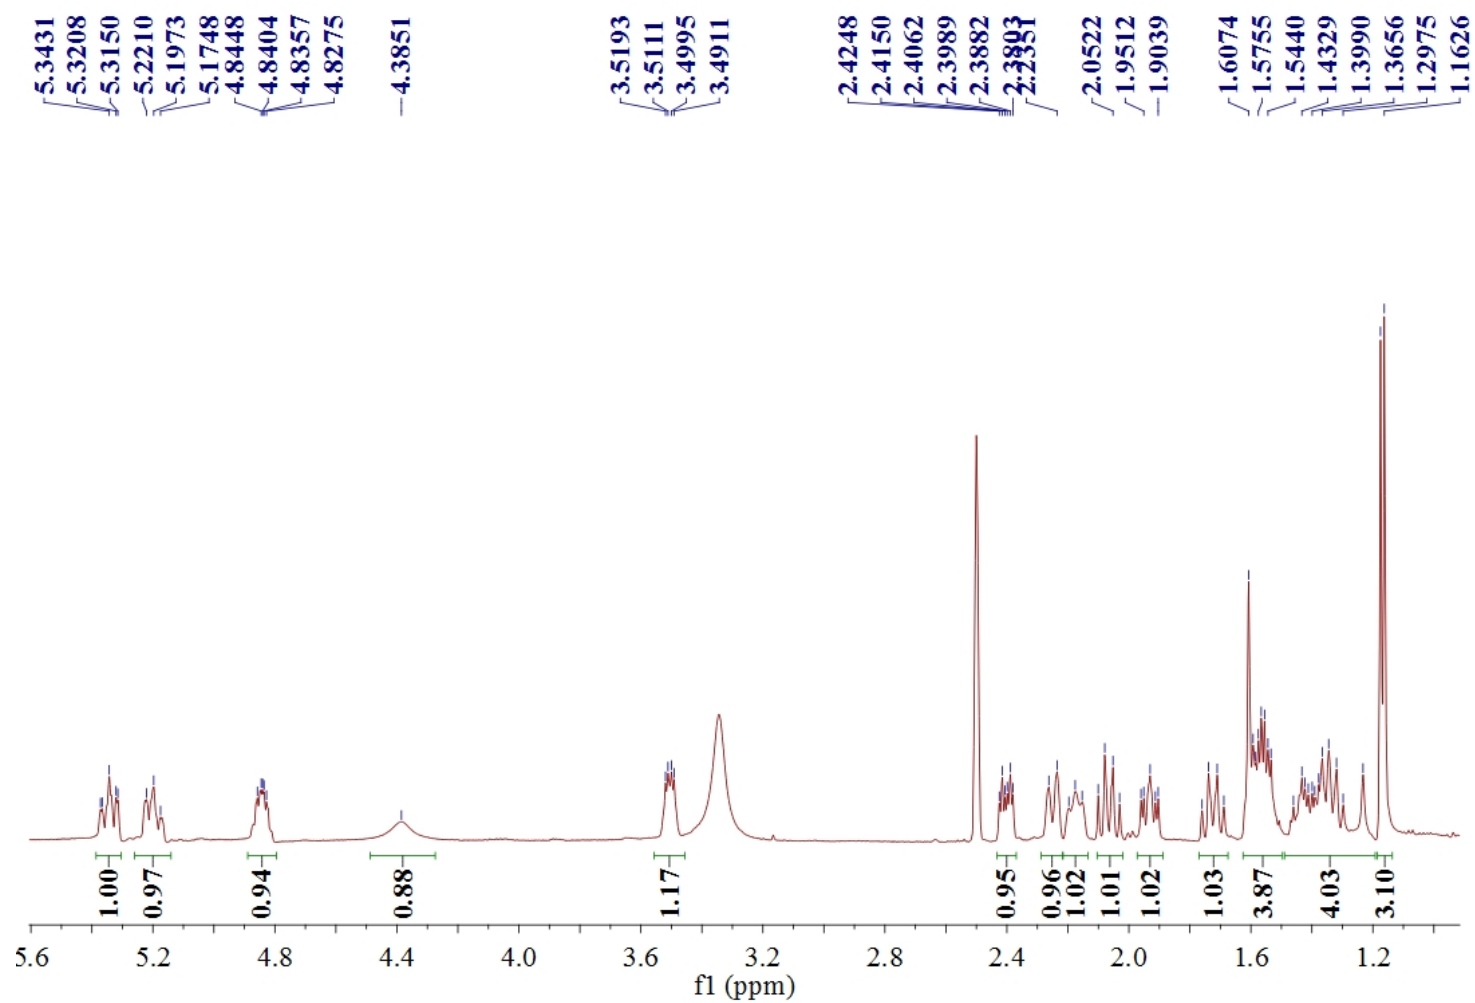

**Figure S4.**  $^{13}\text{C}$  NMR (125 MHz,  $\text{DMSO-}d_6$ ) and DEPT spectra of compound **1**;

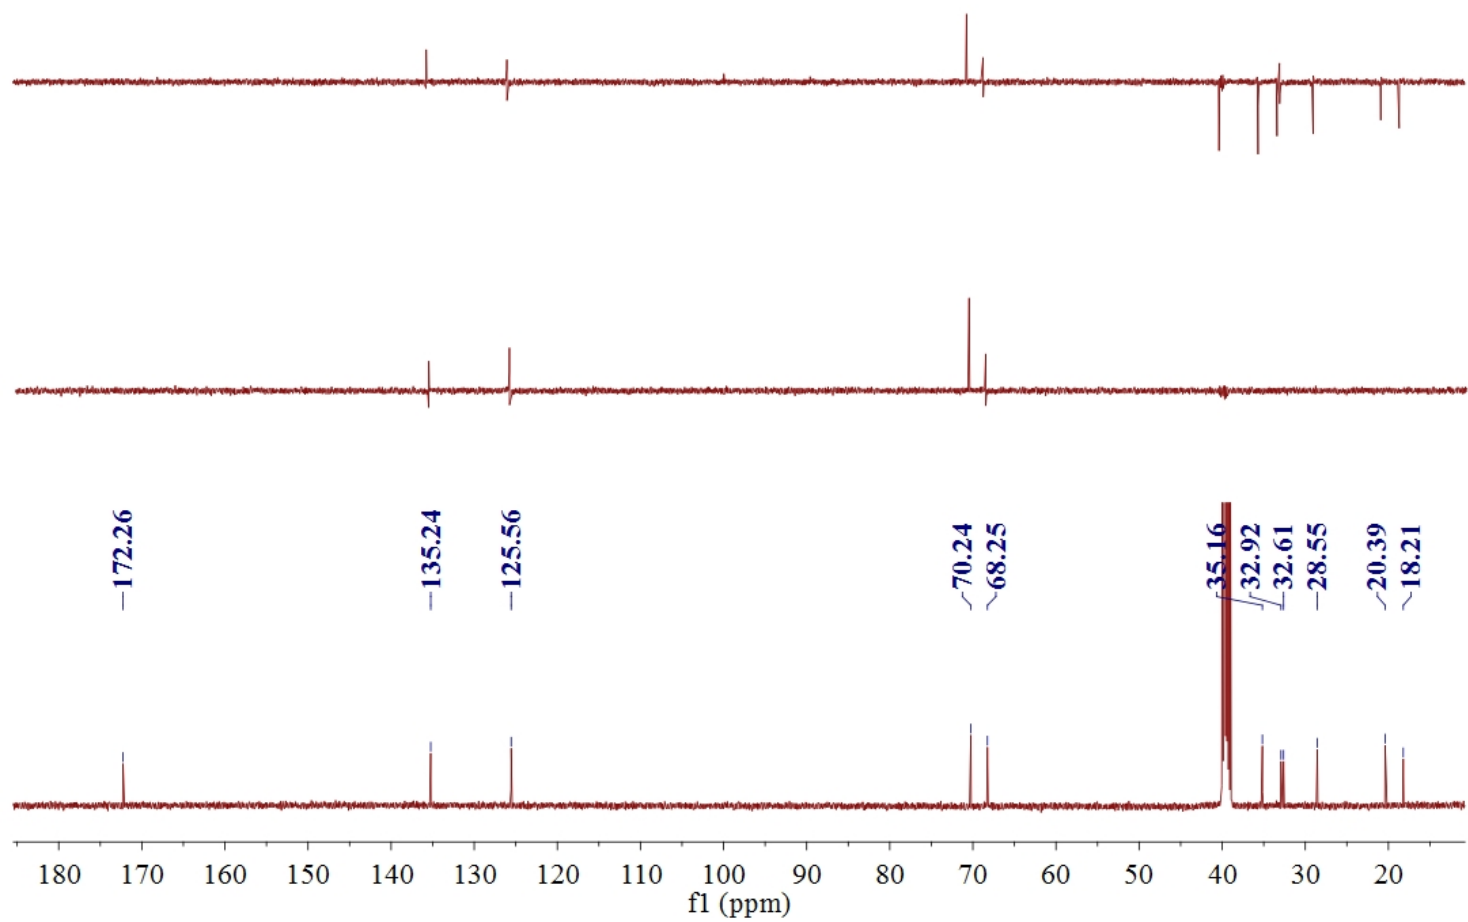

**Figure S5.** COSY spectrum of compound **1**;

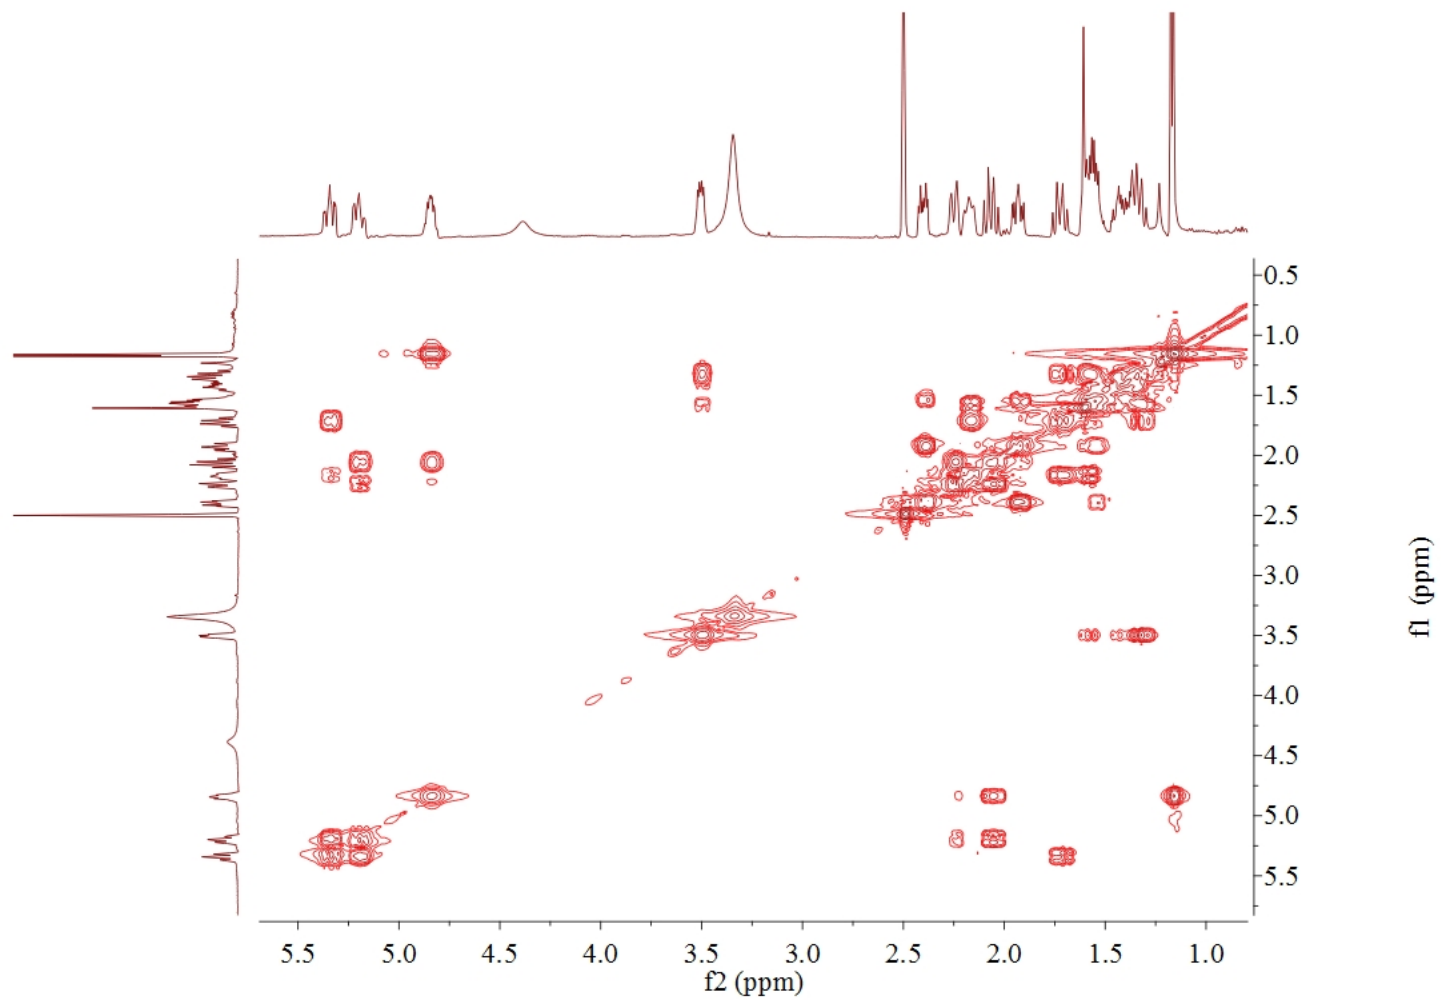



**Figure S6.** HSQC spectrum of compound **1**;

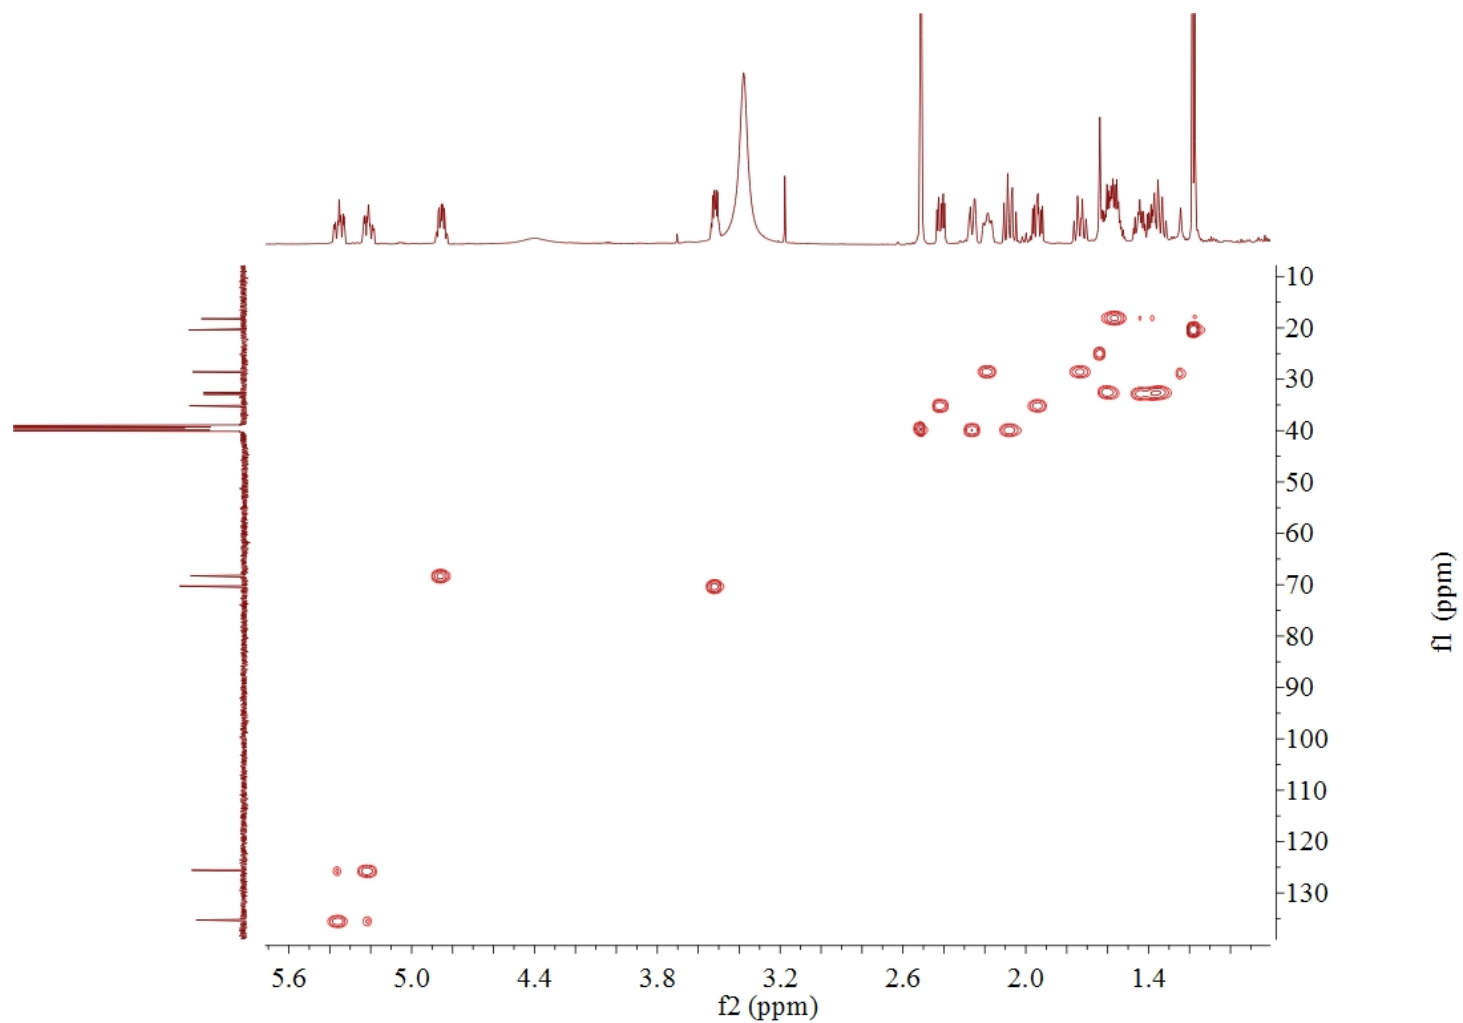

Figure S7. HMBC spectrum of compound 1;

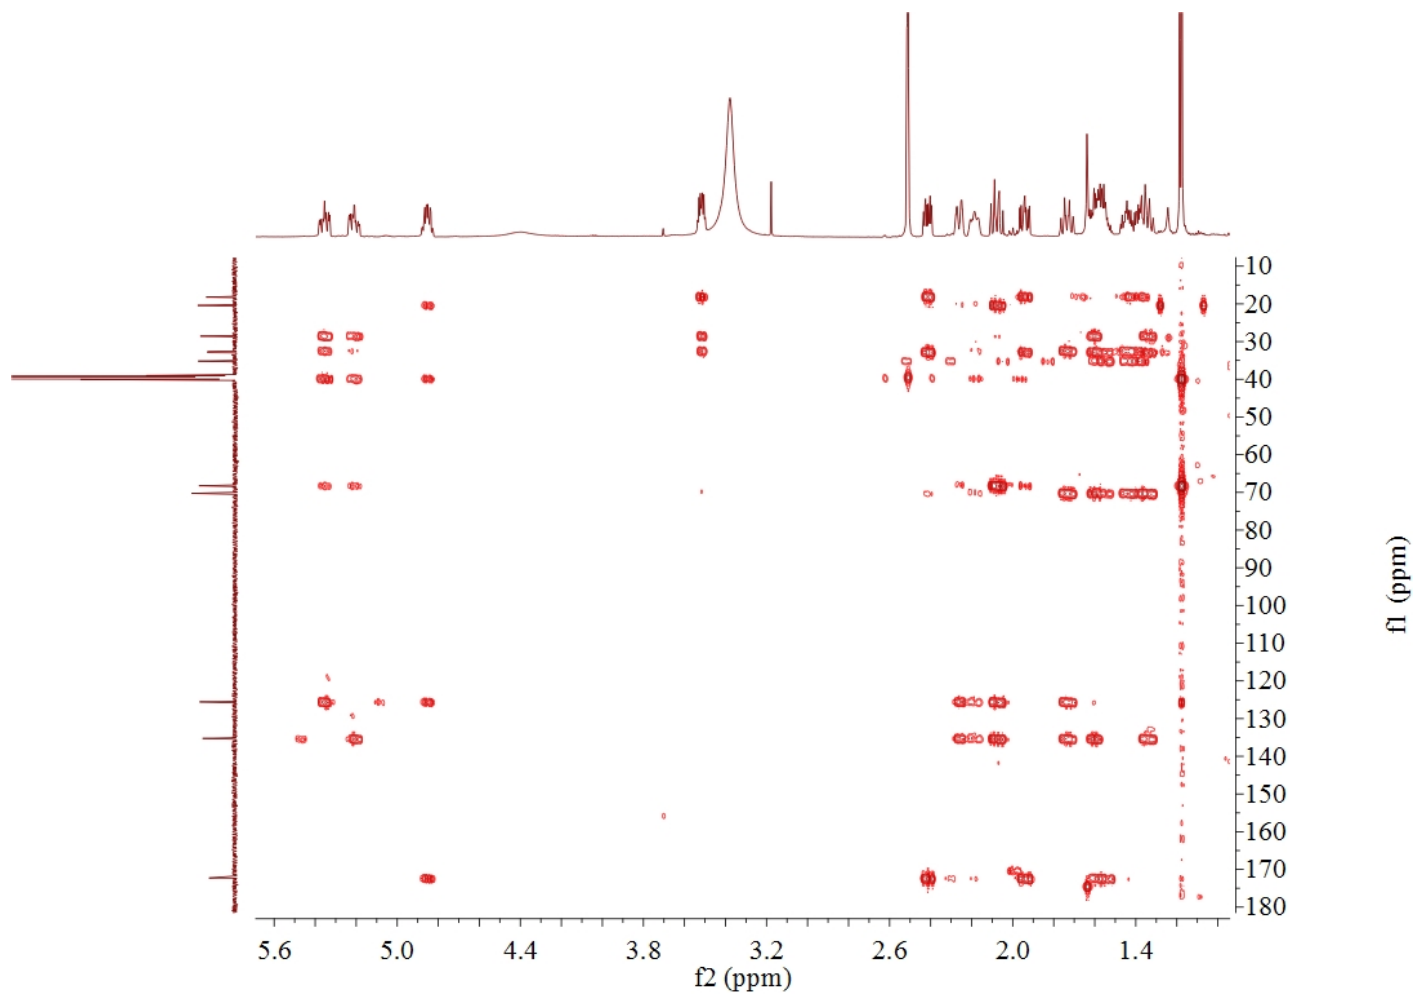

**Figure S8.** NOESY spectrum of compound **1**;

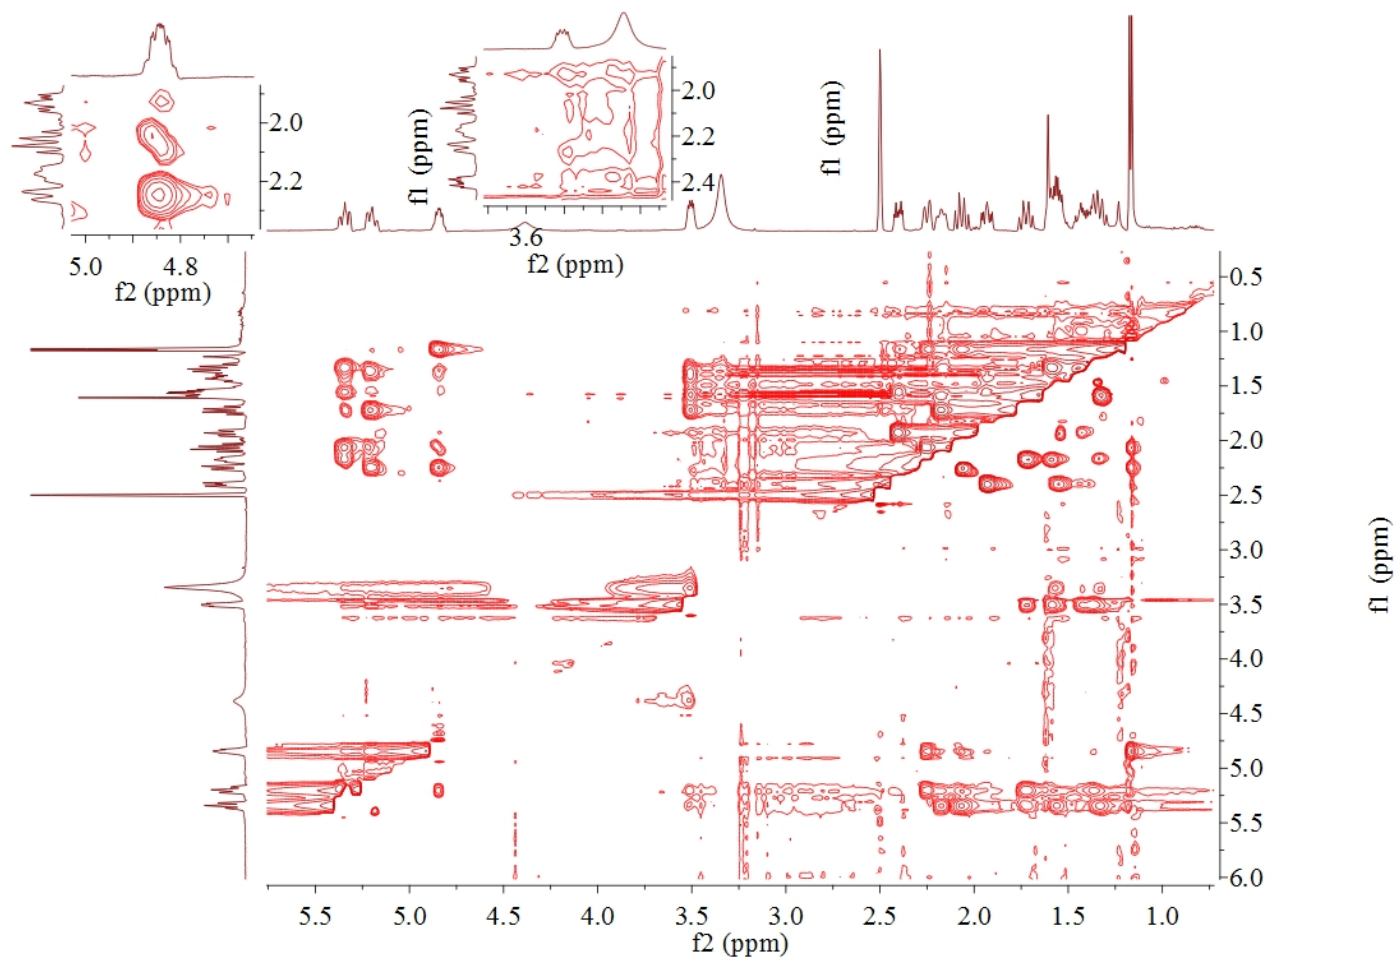

Figure S9.  $^1\text{H}$  NMR (500 MHz,  $\text{DMSO-}d_6$ ) spectrum of (*S*)-MTPA ester (**1a**);

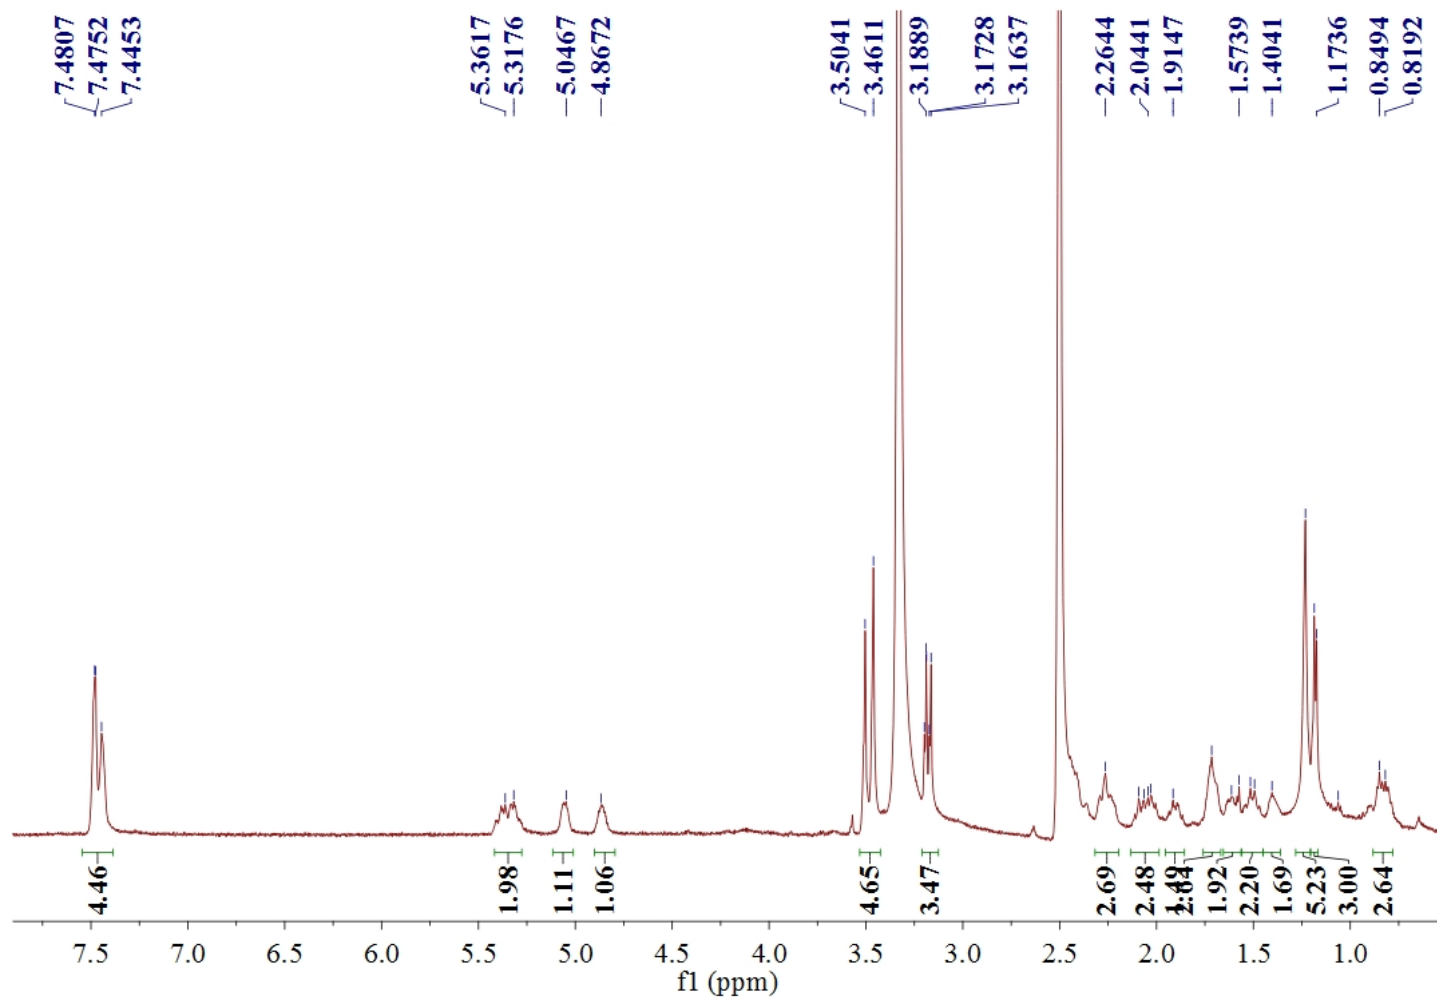

**Figure S10.**  $^1\text{H}$  NMR (500 MHz,  $\text{DMSO-}d_6$ ) spectrum of (*R*)-MTPA ester (**1b**);

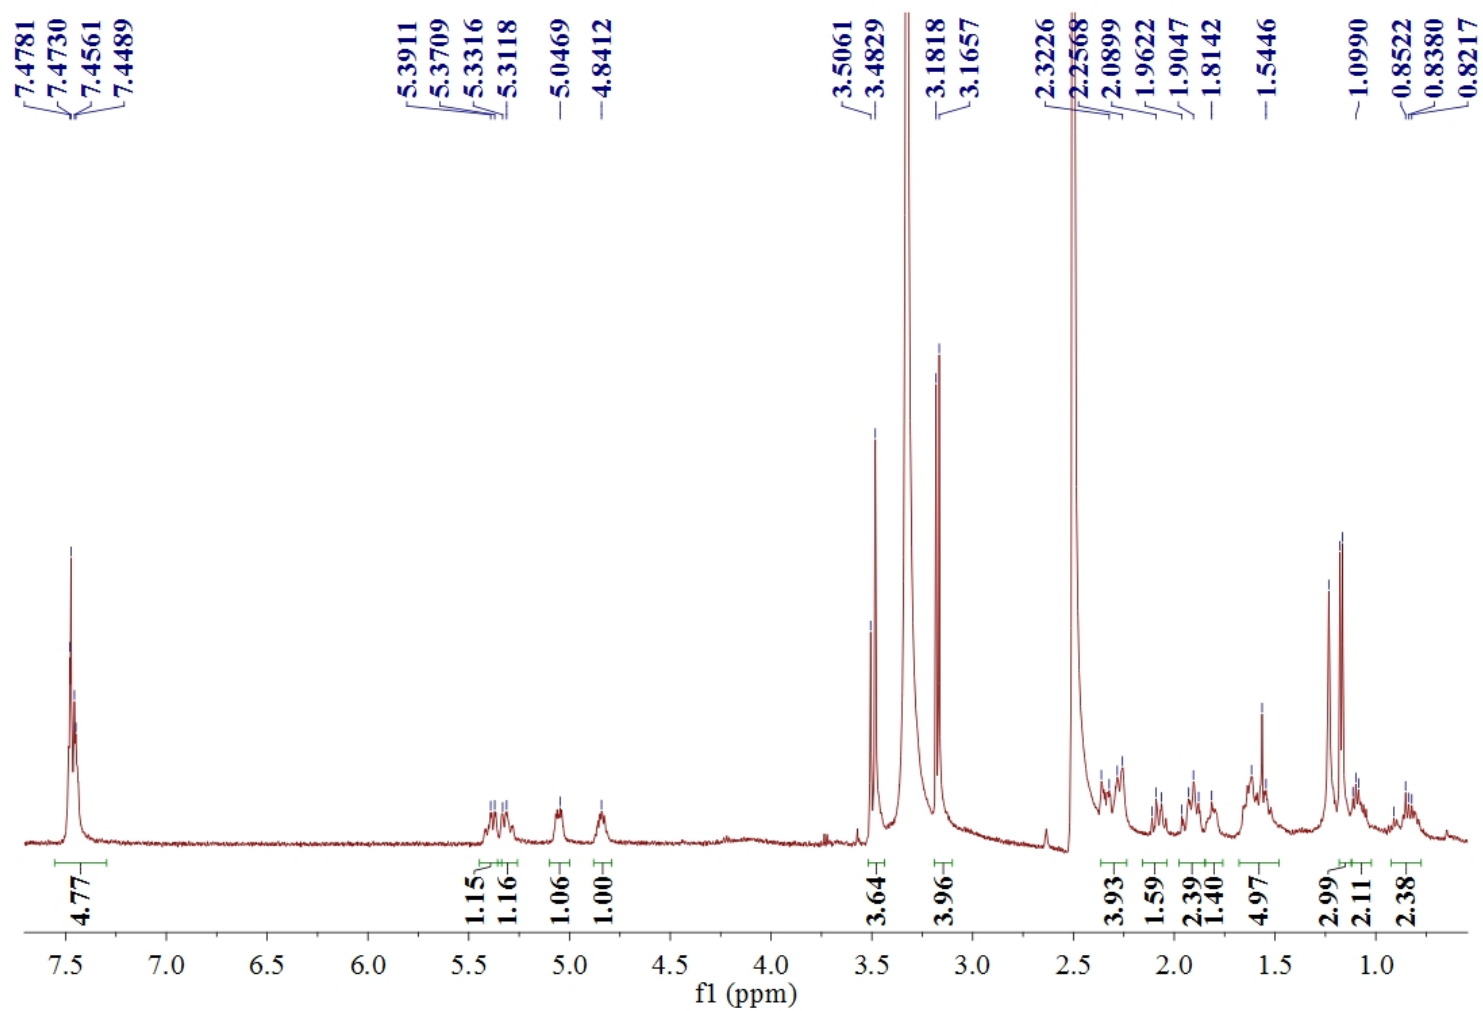

**Figure S11.** HRESI mass spectrum of compound **2**;

20171102-MA299-34\_171102100116 #91-93 RT: 0.72-0.74 AV: 3 NL: 8.56E5  
T: FTMS + p ESI Full ms [150.00-1000.00]

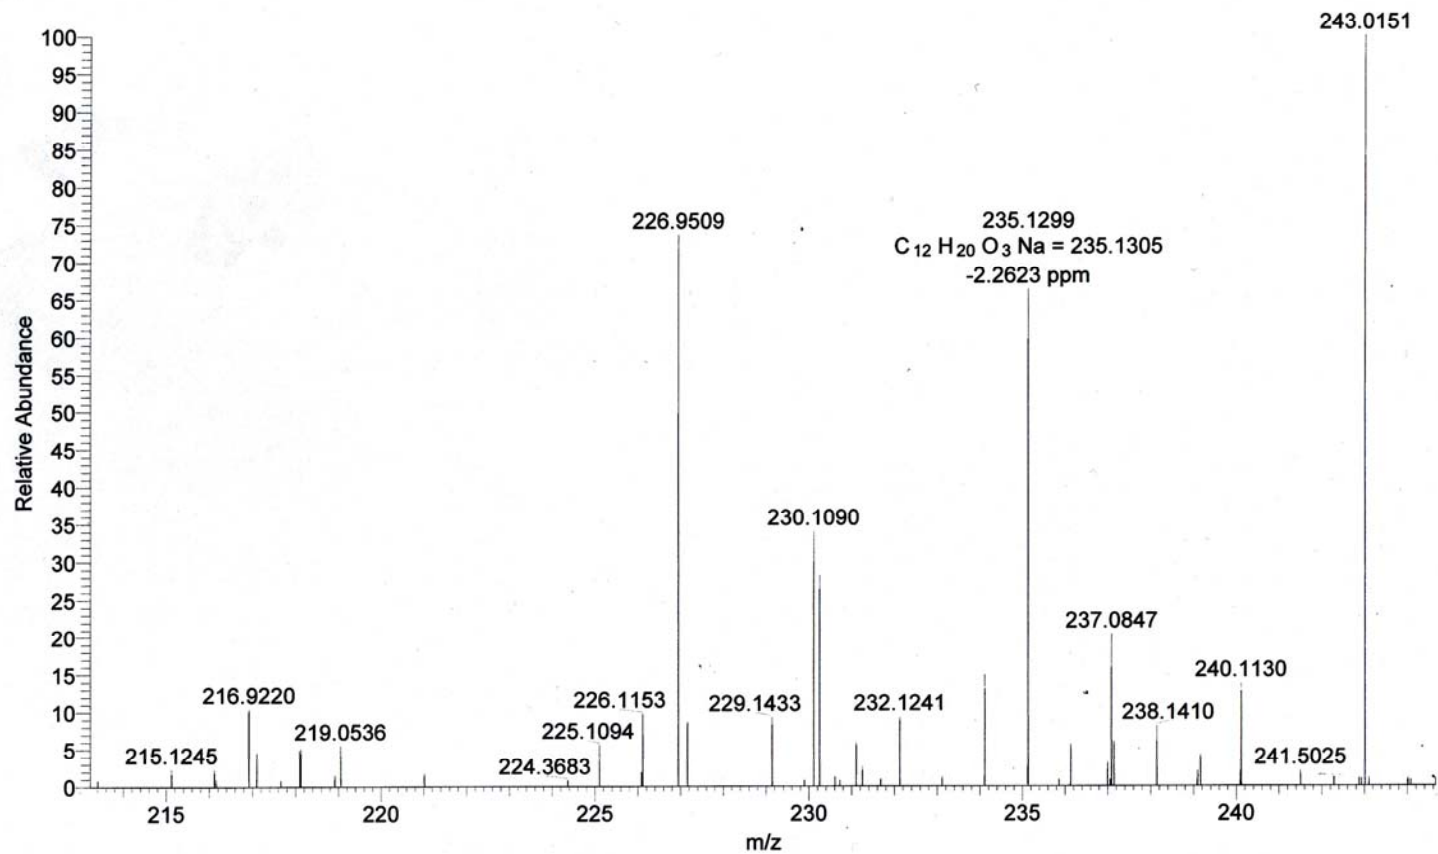

**Figure S12.**  $^1\text{H}$  NMR (500 MHz,  $\text{DMSO-}d_6$ ) spectrum of compound **2**;

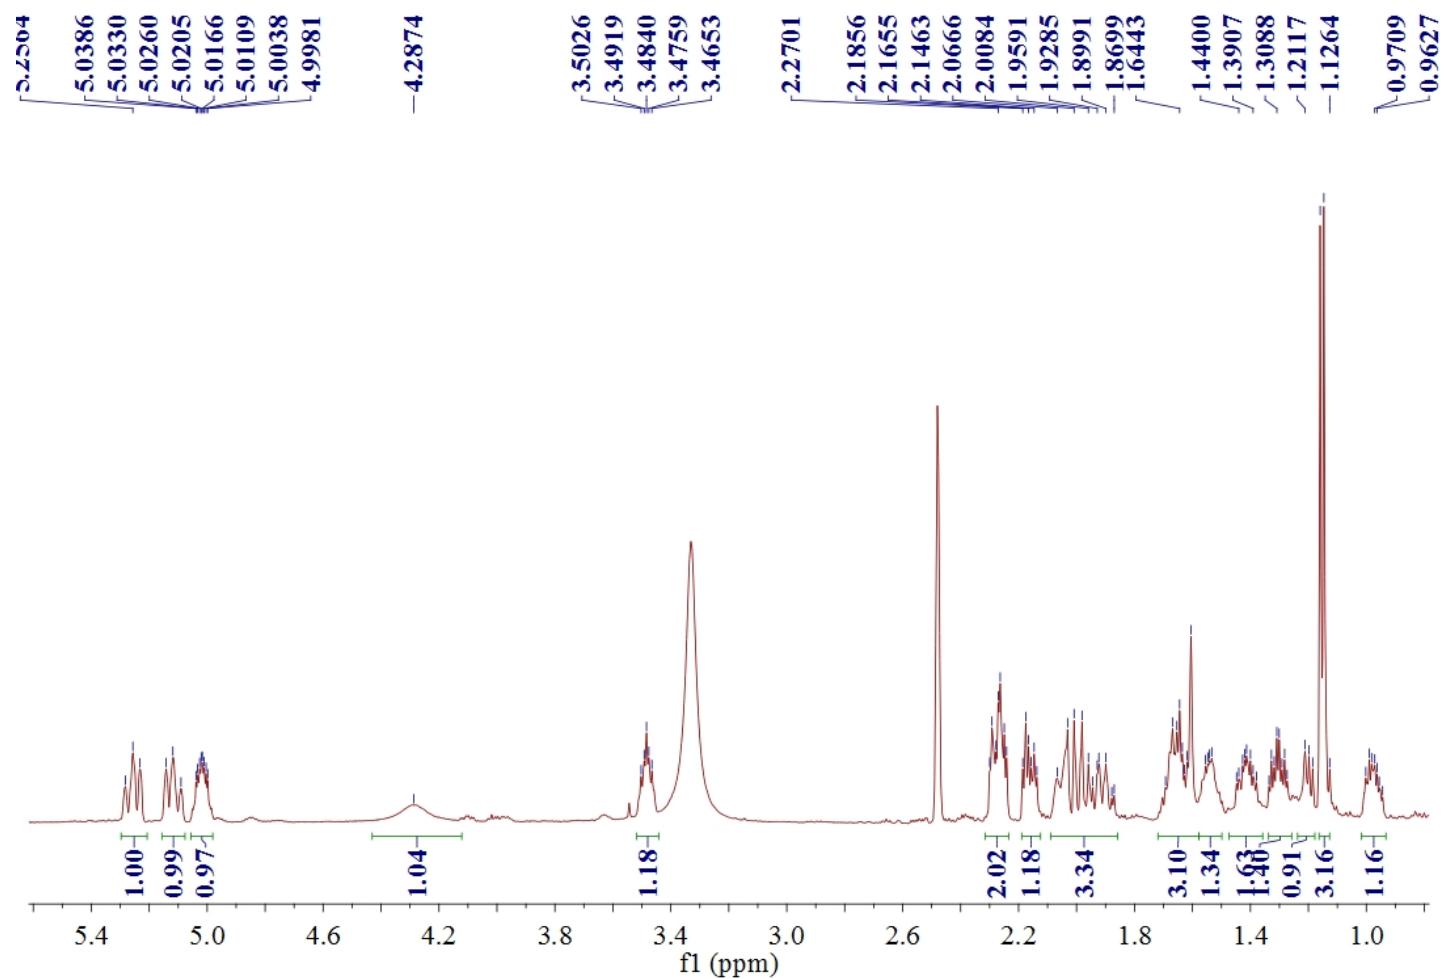

**Figure S13.**  $^{13}\text{C}$  NMR (125 MHz,  $\text{DMSO-}d_6$ ) and DEPT spectra of compound **2**;

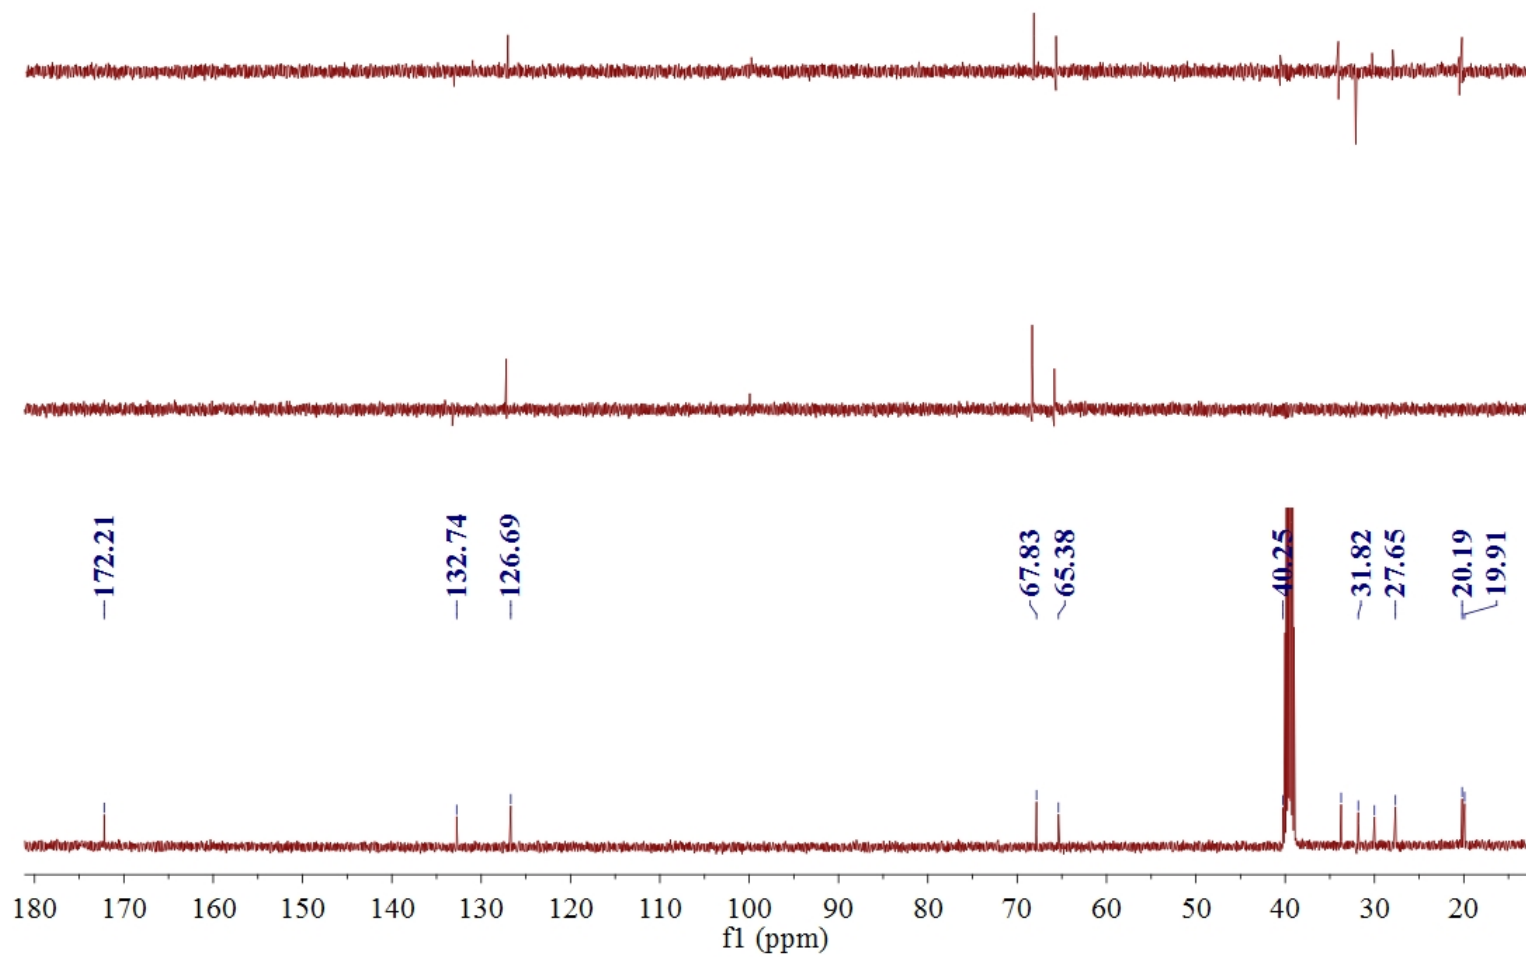



**Figure S14.** COSY spectrum of compound **2**;

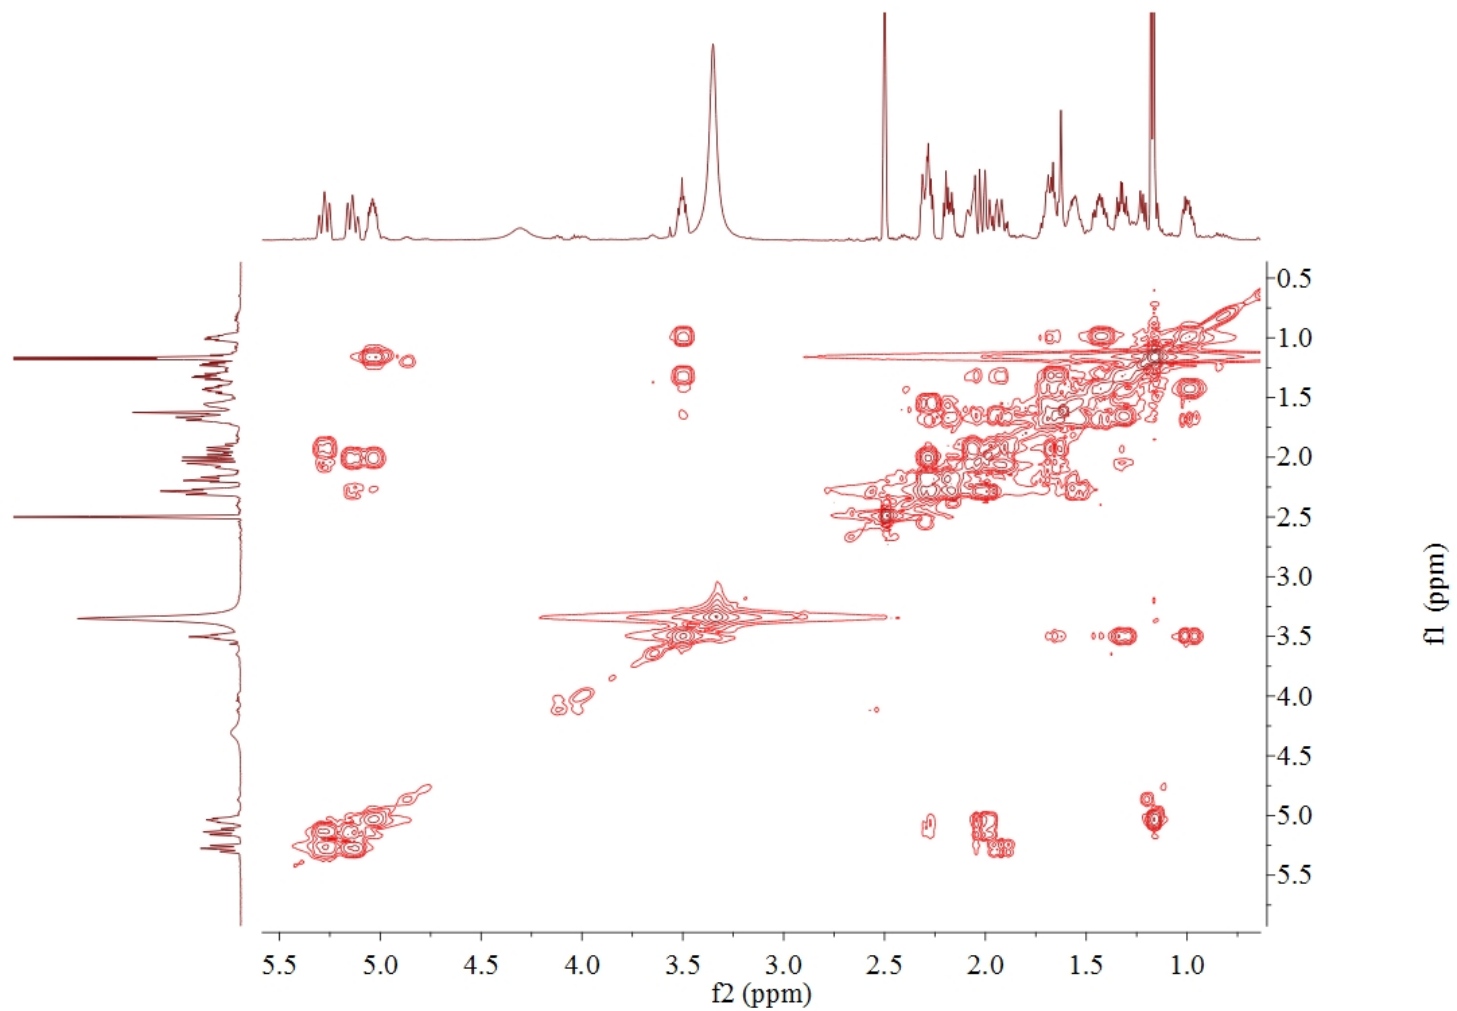

**Figure S15.** HSQC spectrum of compound **2**;

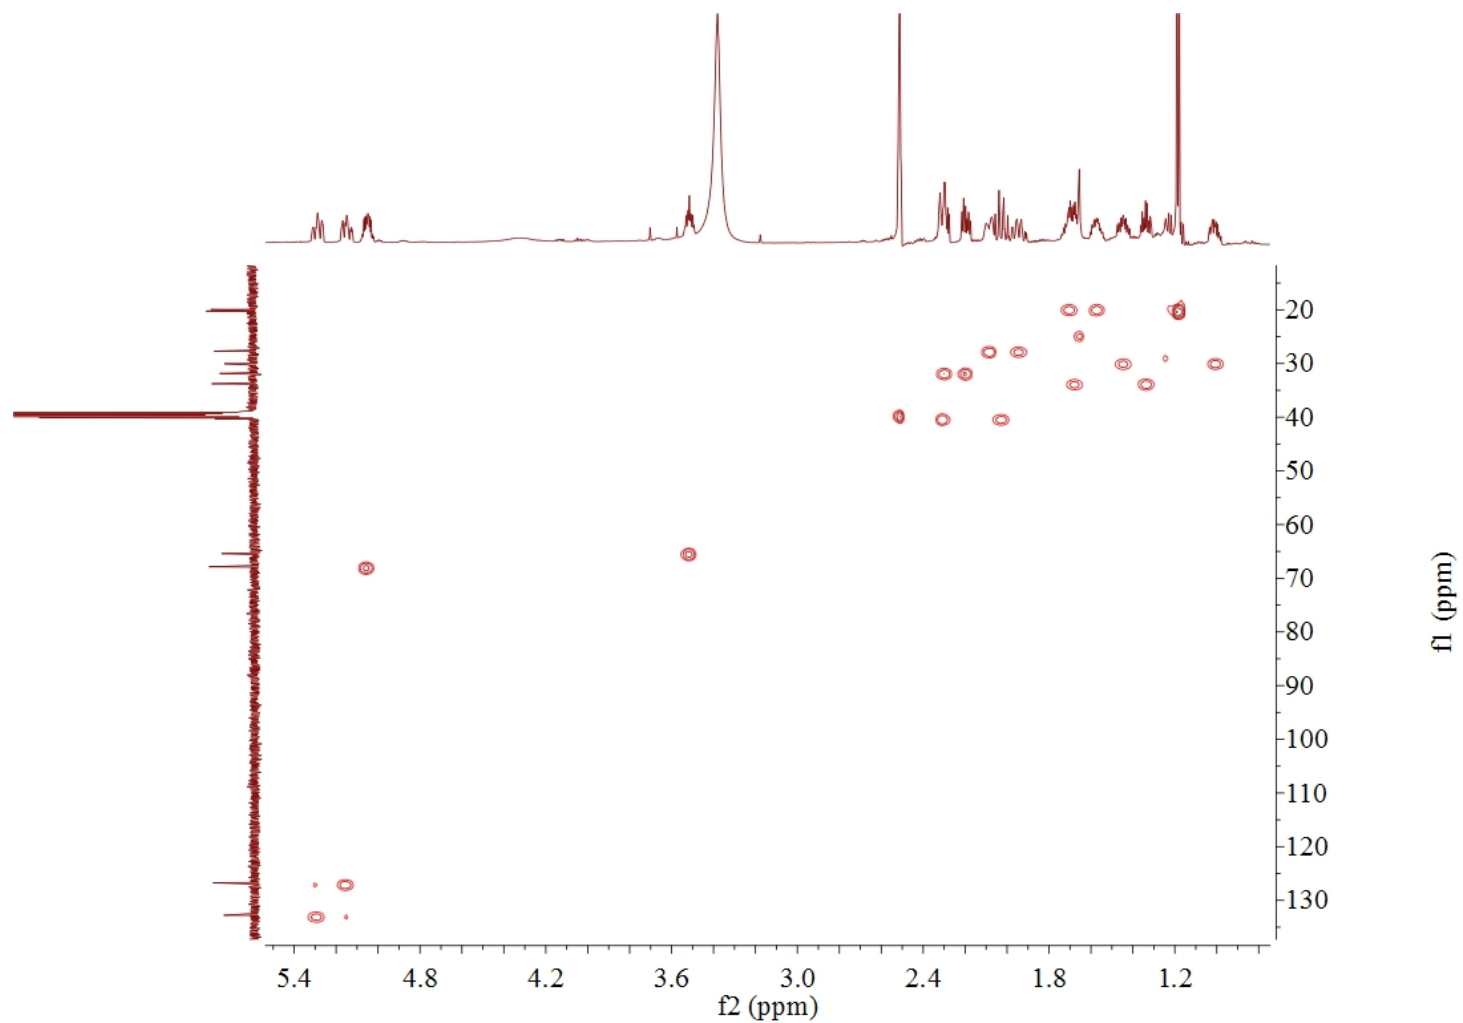

**Figure S16.** HMBC spectrum of compound **2**;

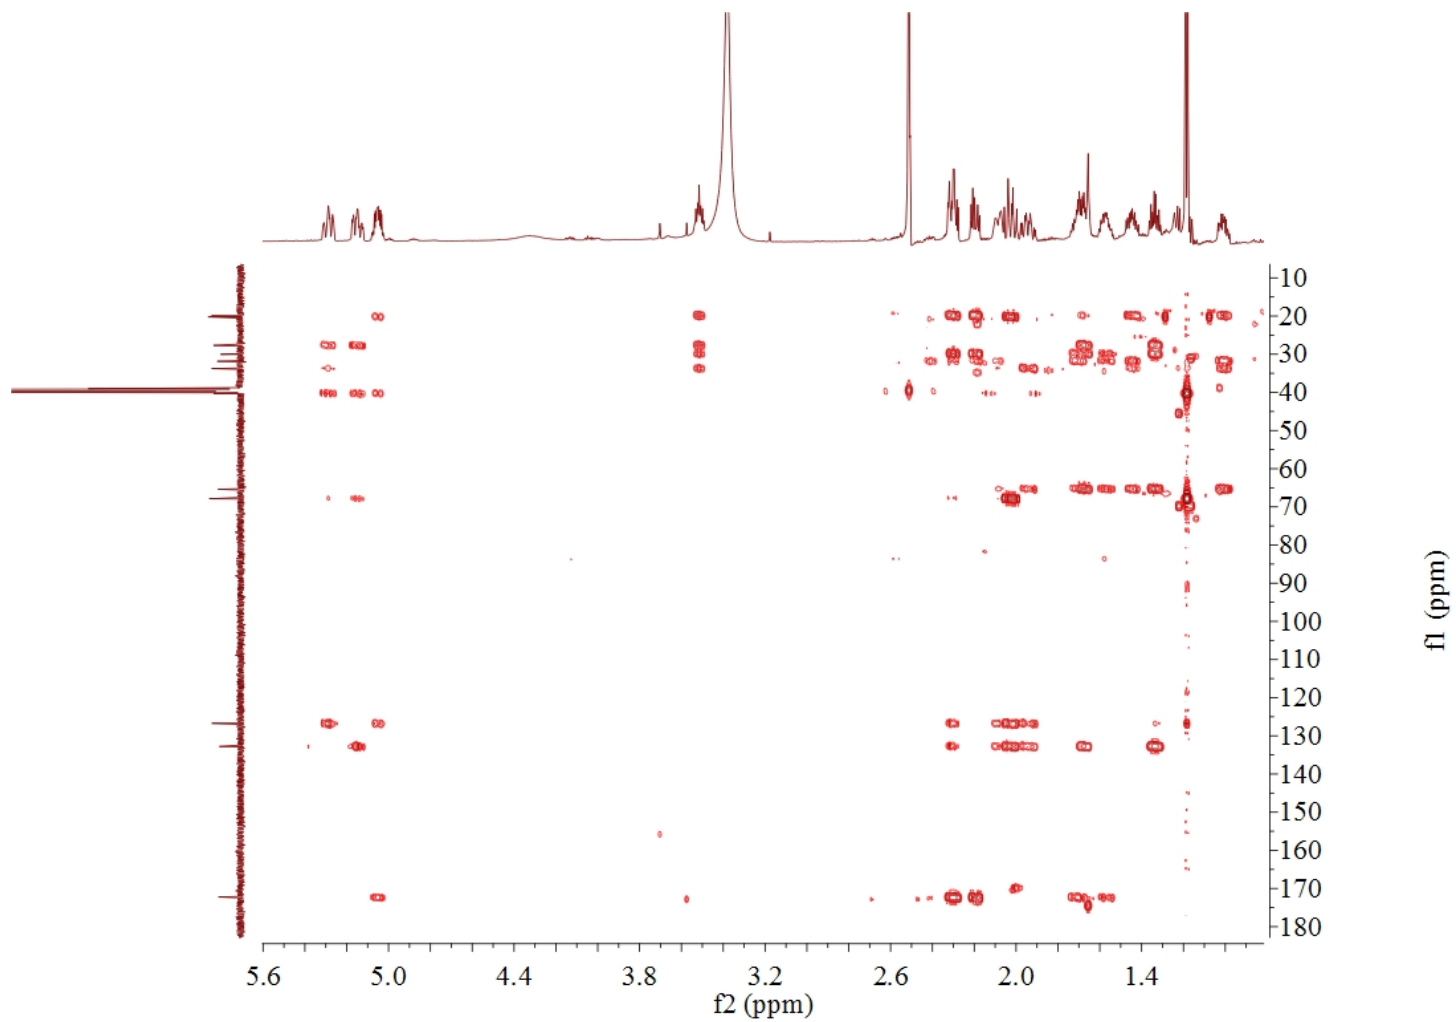

**Figure S17.** NOESY spectrum of compound **2**;

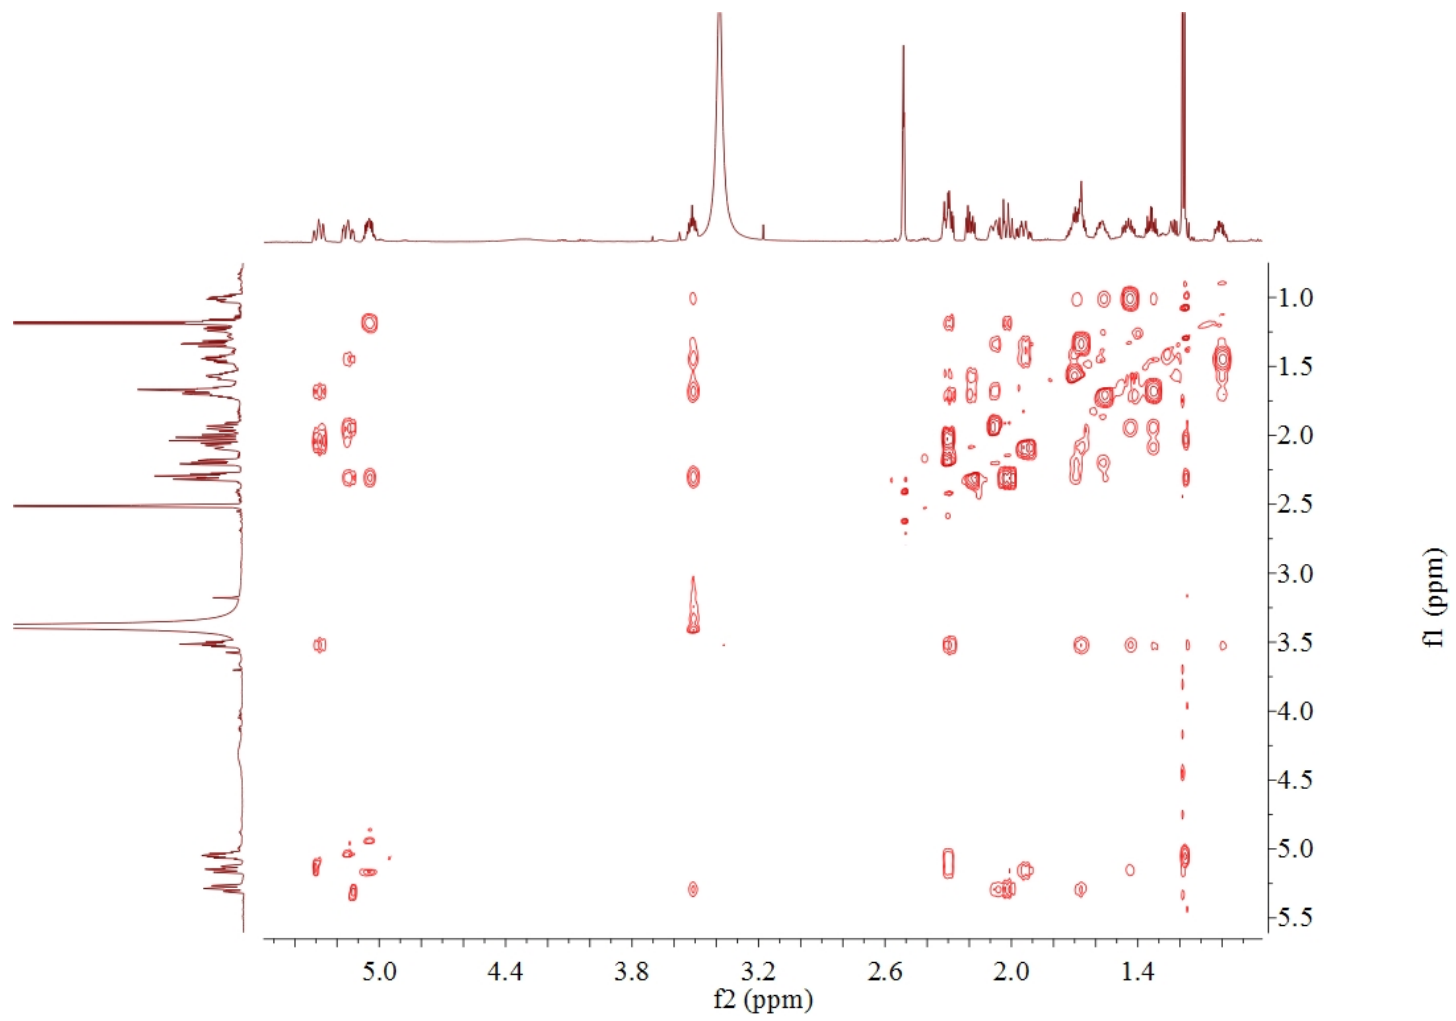

**Figure S18.** HRESI mass spectrum of compound **3**;

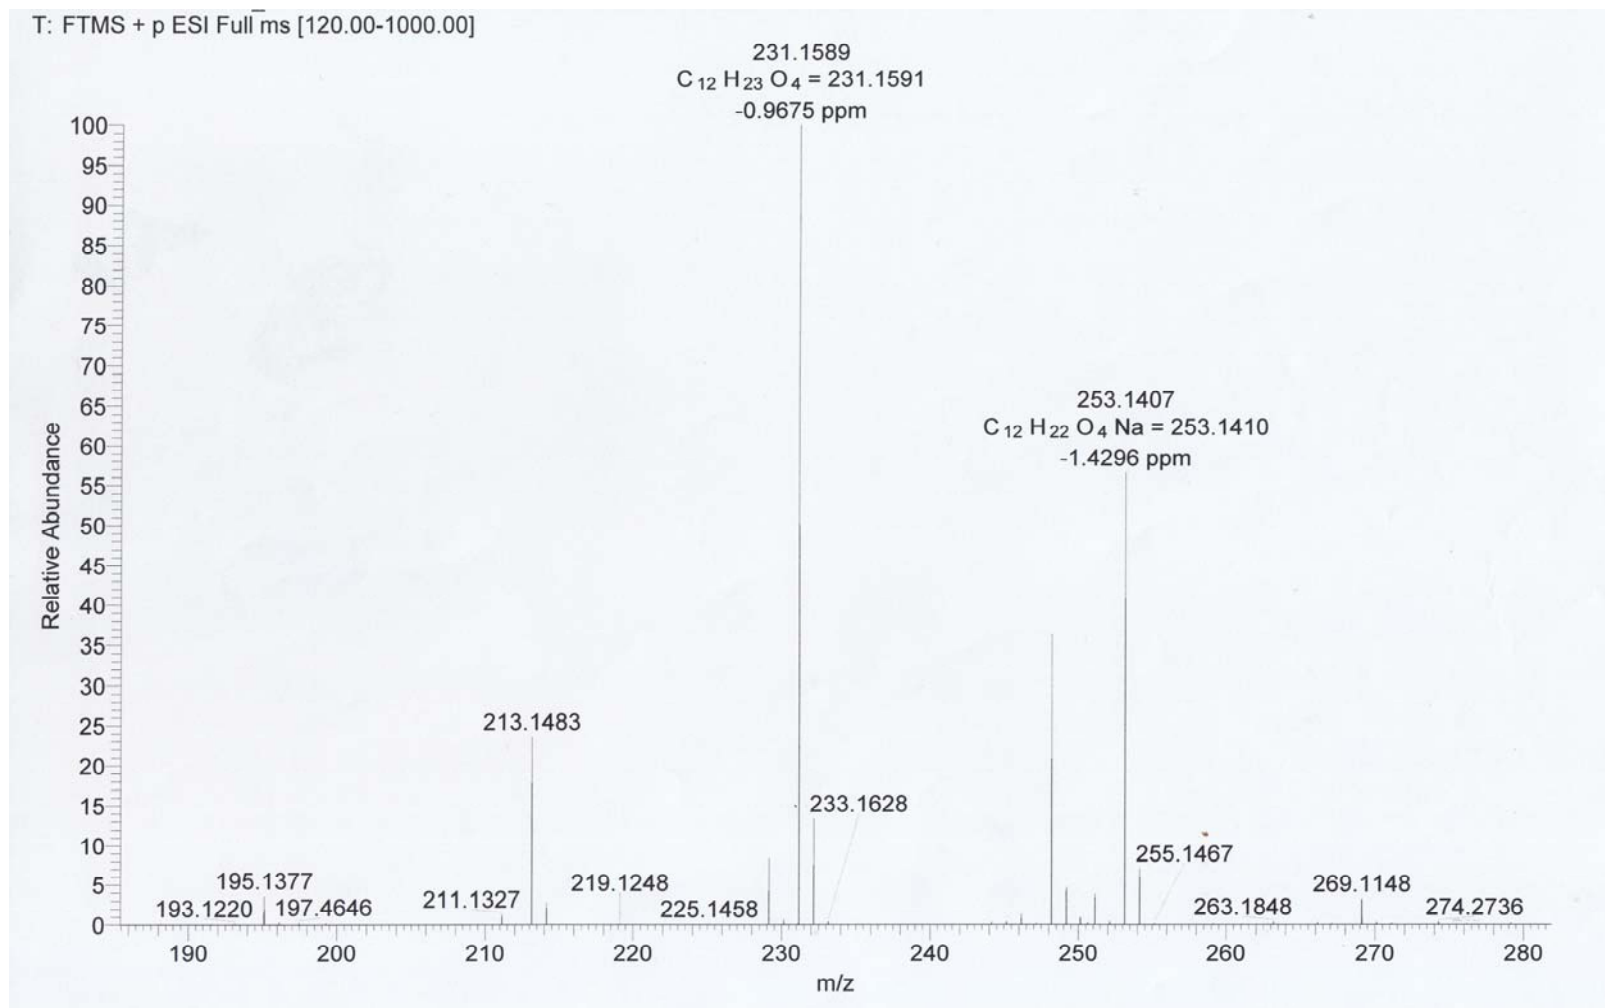

**Figure S19.**  $^1\text{H}$  NMR (500 MHz,  $\text{DMSO-}d_6$ ) spectrum of compound **3**;

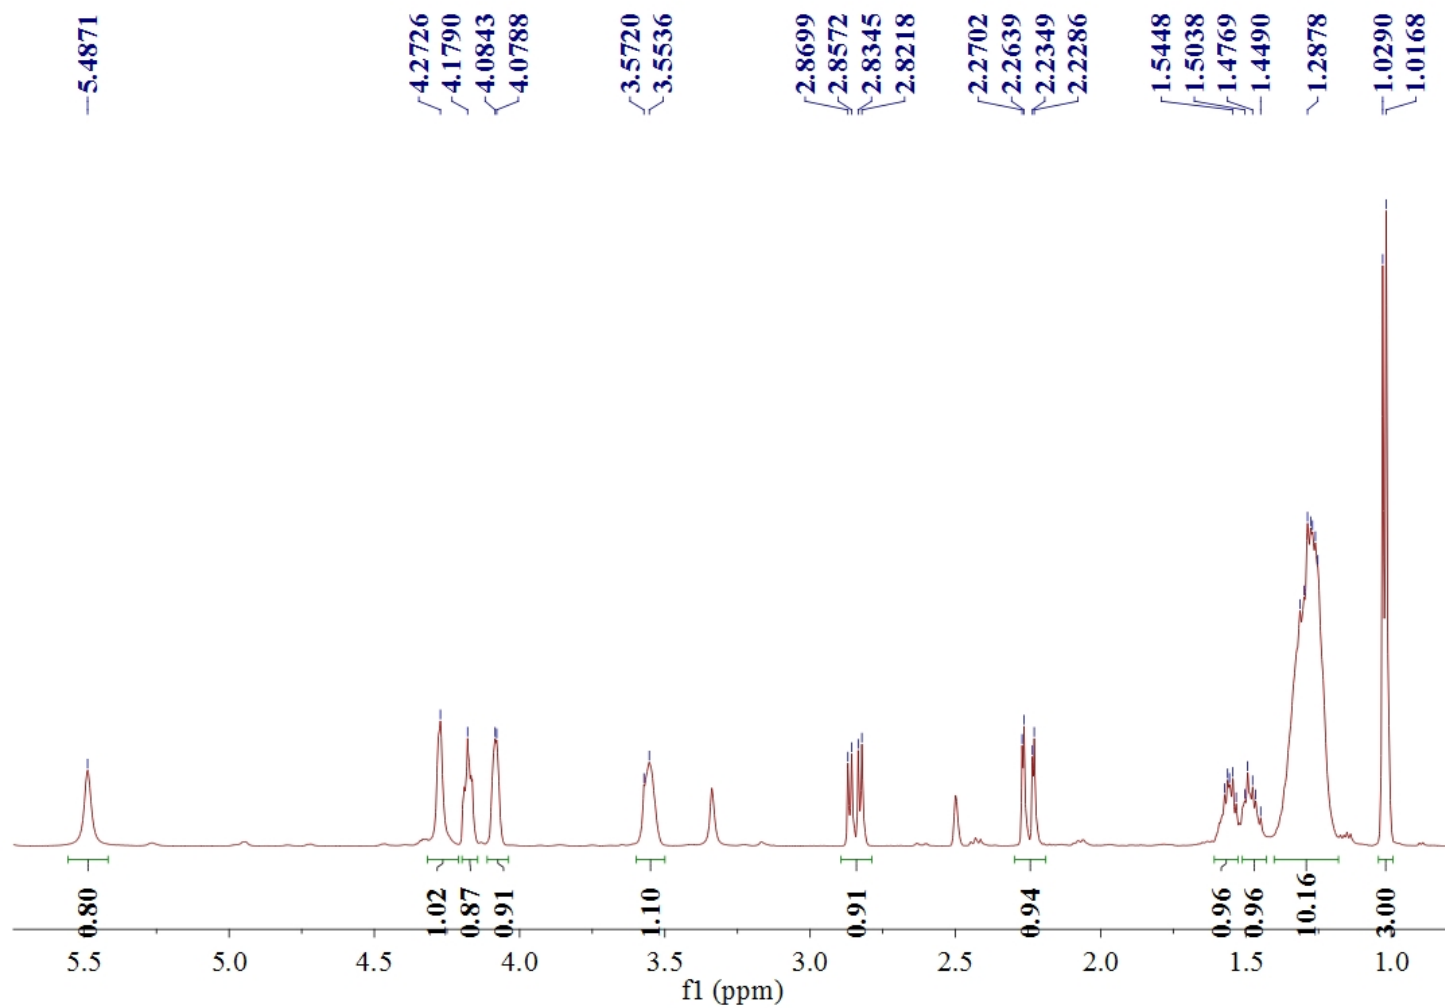

**Figure S20.**  $^1\text{H}$  NMR (500 MHz,  $\text{CDCl}_3$ ) spectrum of compound **3**;

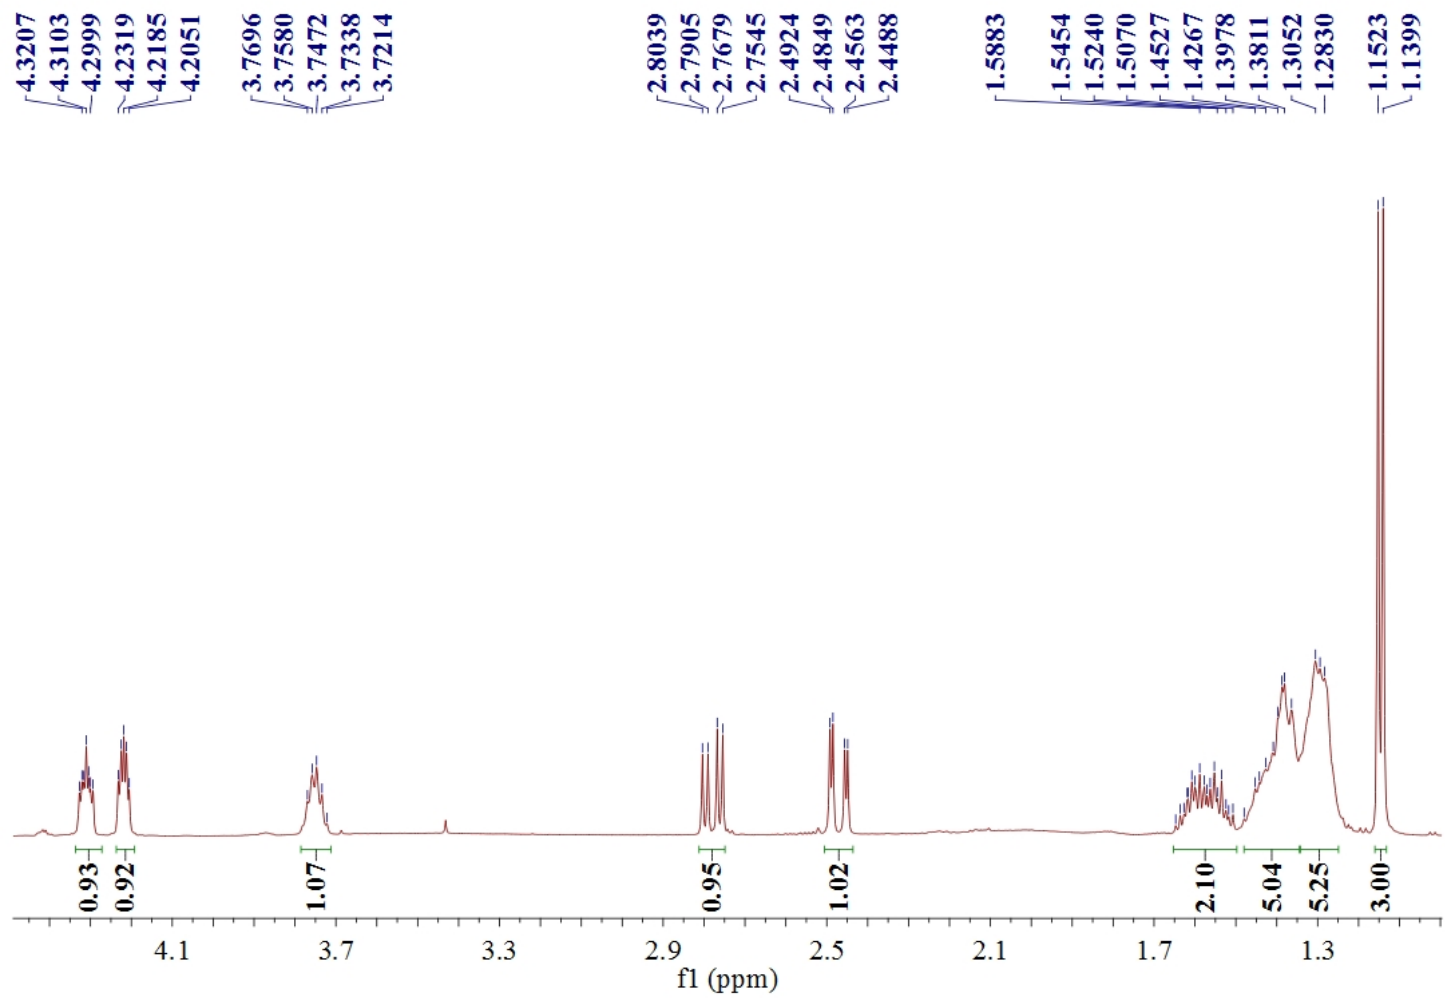

**Figure S21.**  $^{13}\text{C}$  NMR (125 MHz,  $\text{DMSO-}d_6$ ) and DEPT spectra of compound **3**;

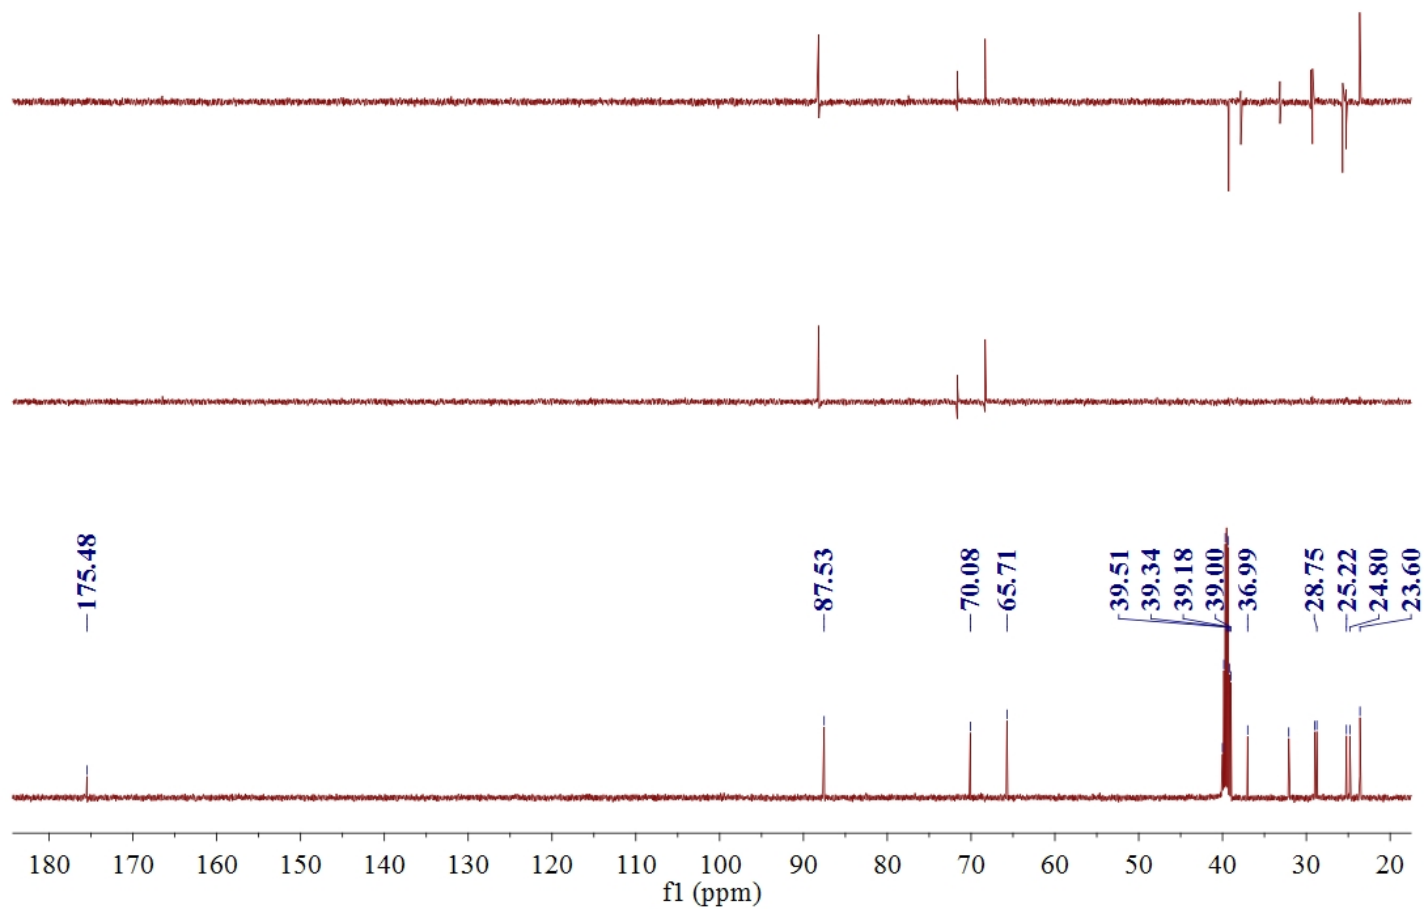



**Figure S22.**  $^{13}\text{C}$  NMR (125 MHz,  $\text{CDCl}_3$ ) and DEPT spectra of compound **3**;

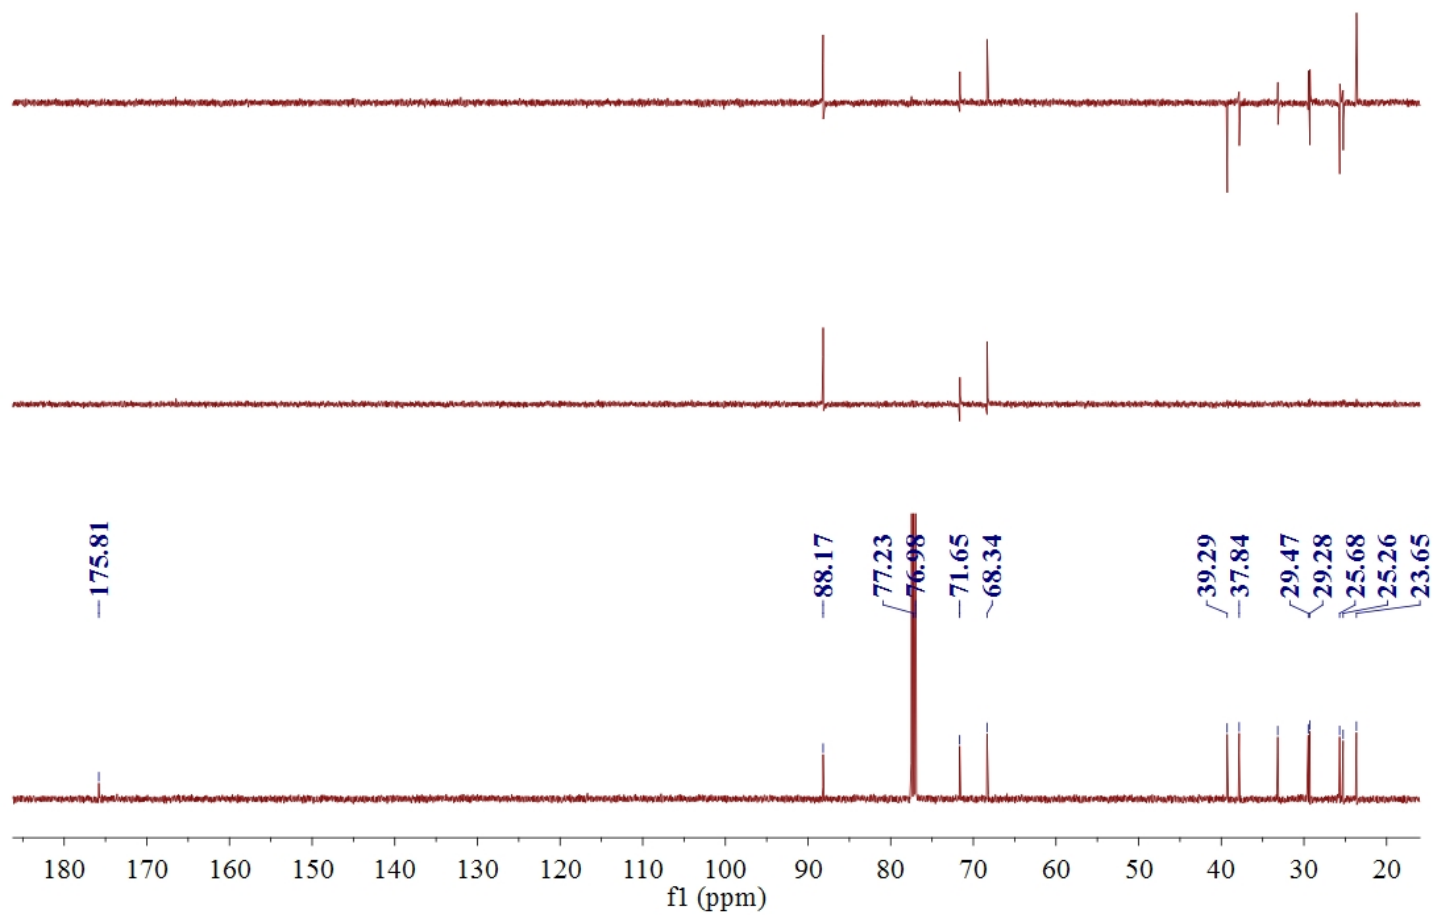

**Figure S23.** COSY spectrum of compound **3** (CDCl<sub>3</sub>);

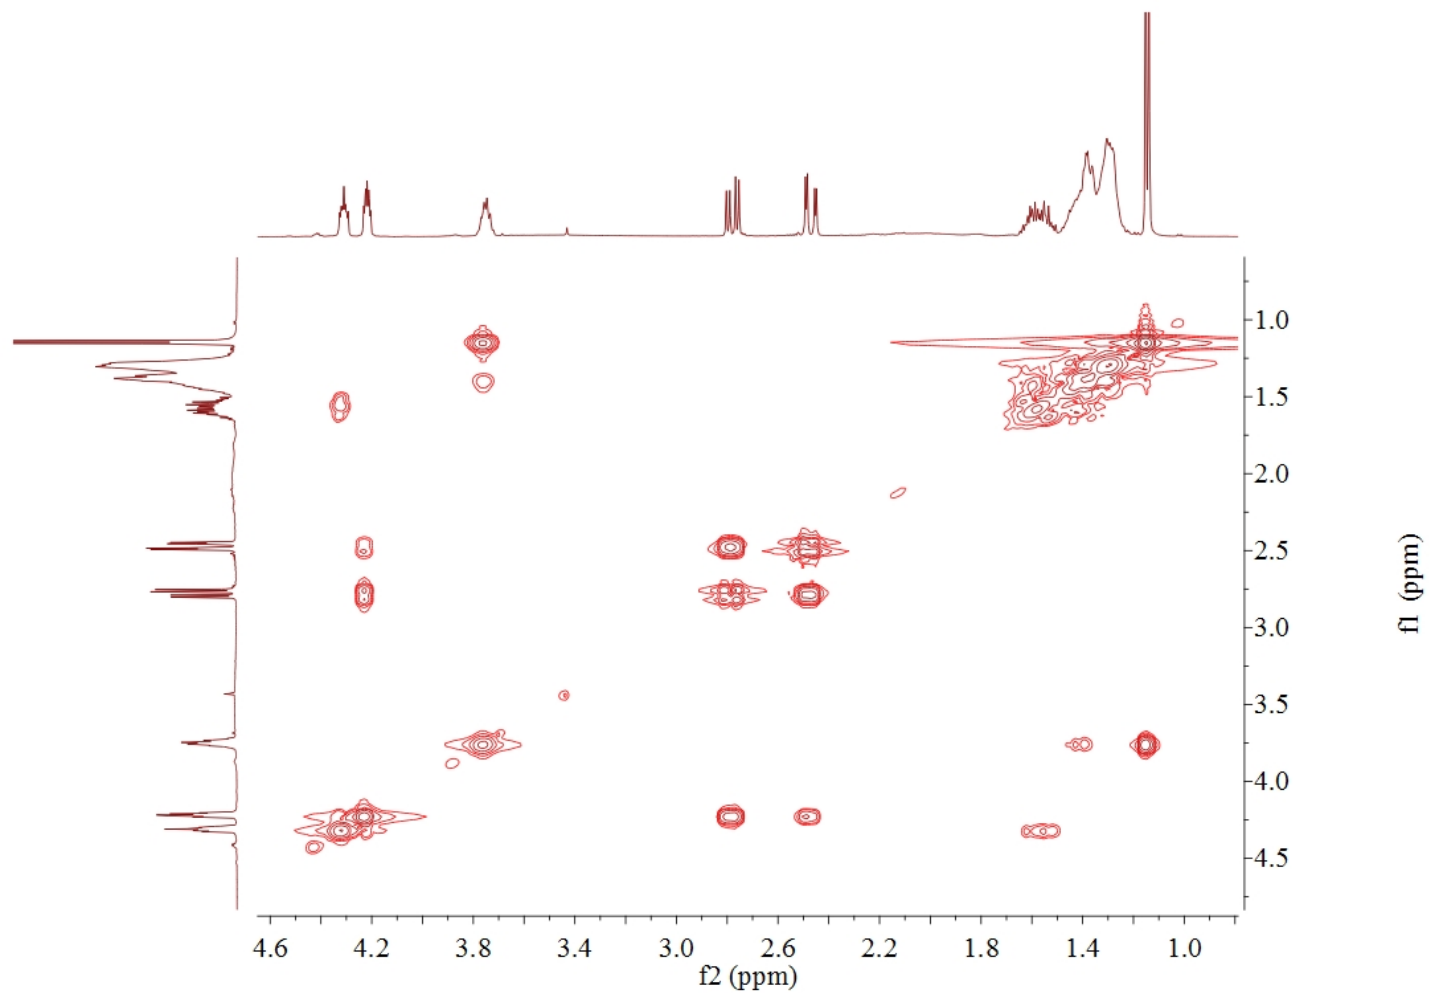

**Figure S24.** HSQC spectrum of compound **3** (DMSO- $d_6$ );

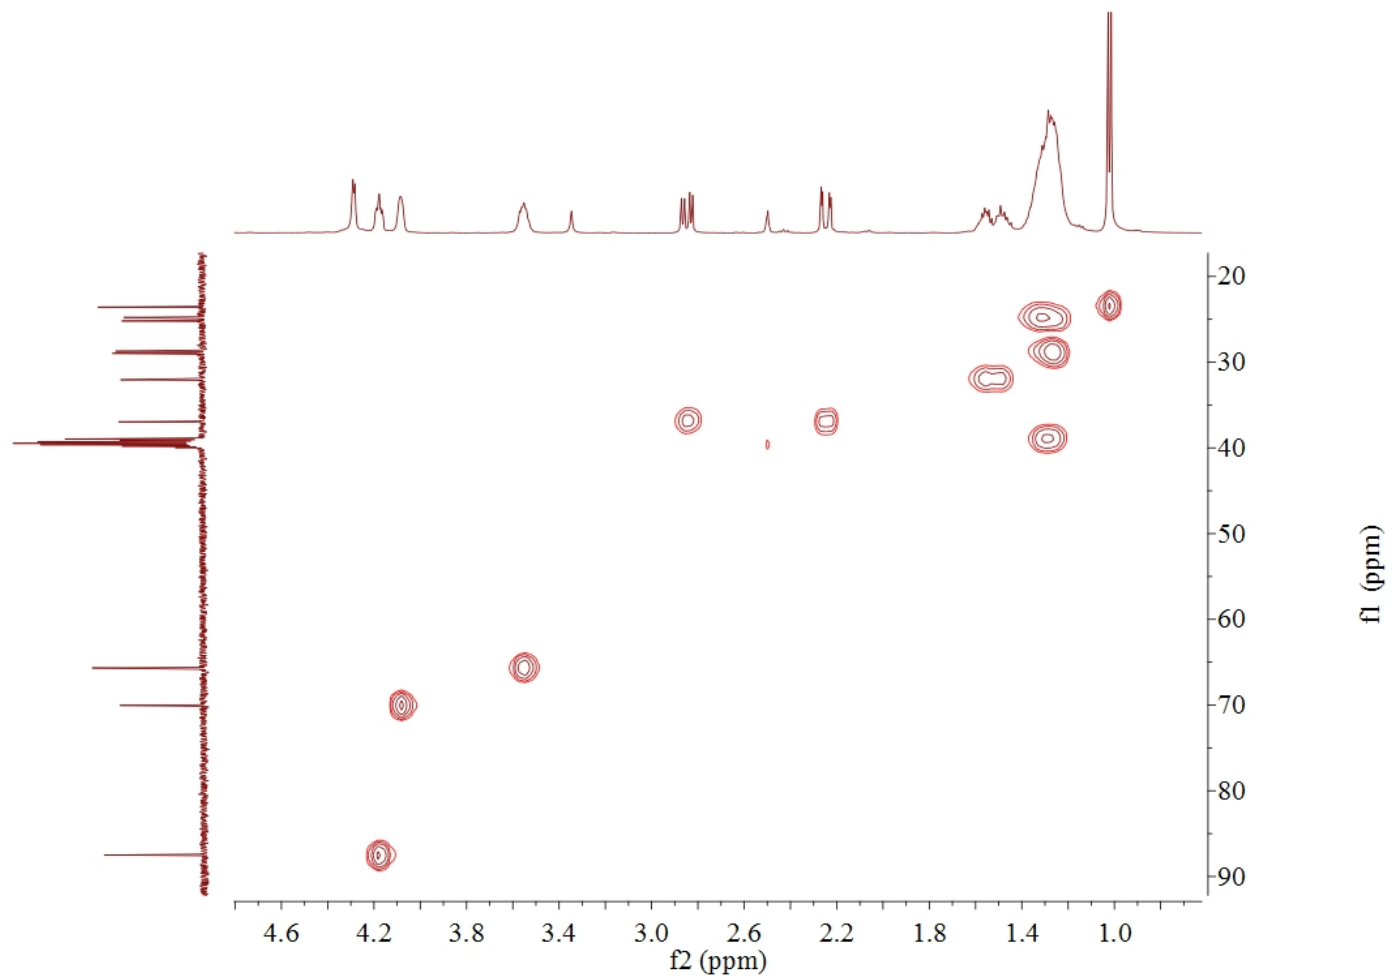

**Figure S25.** HMBC spectrum of compound **3** (CDCl<sub>3</sub>);

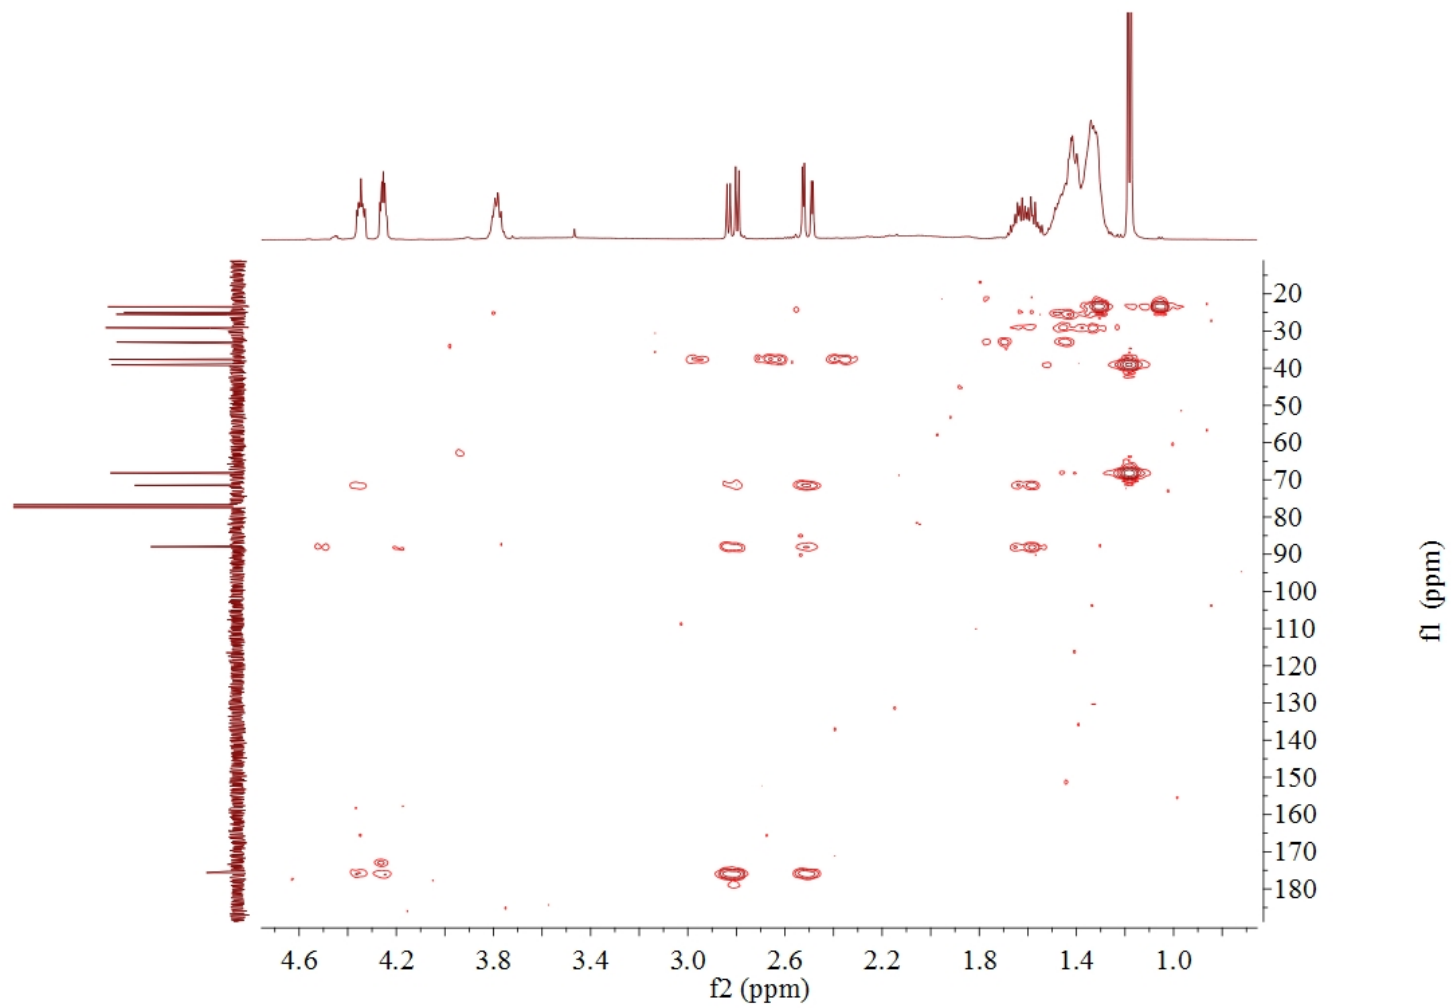

Figure S26. ECD spectrum of compound **3**;

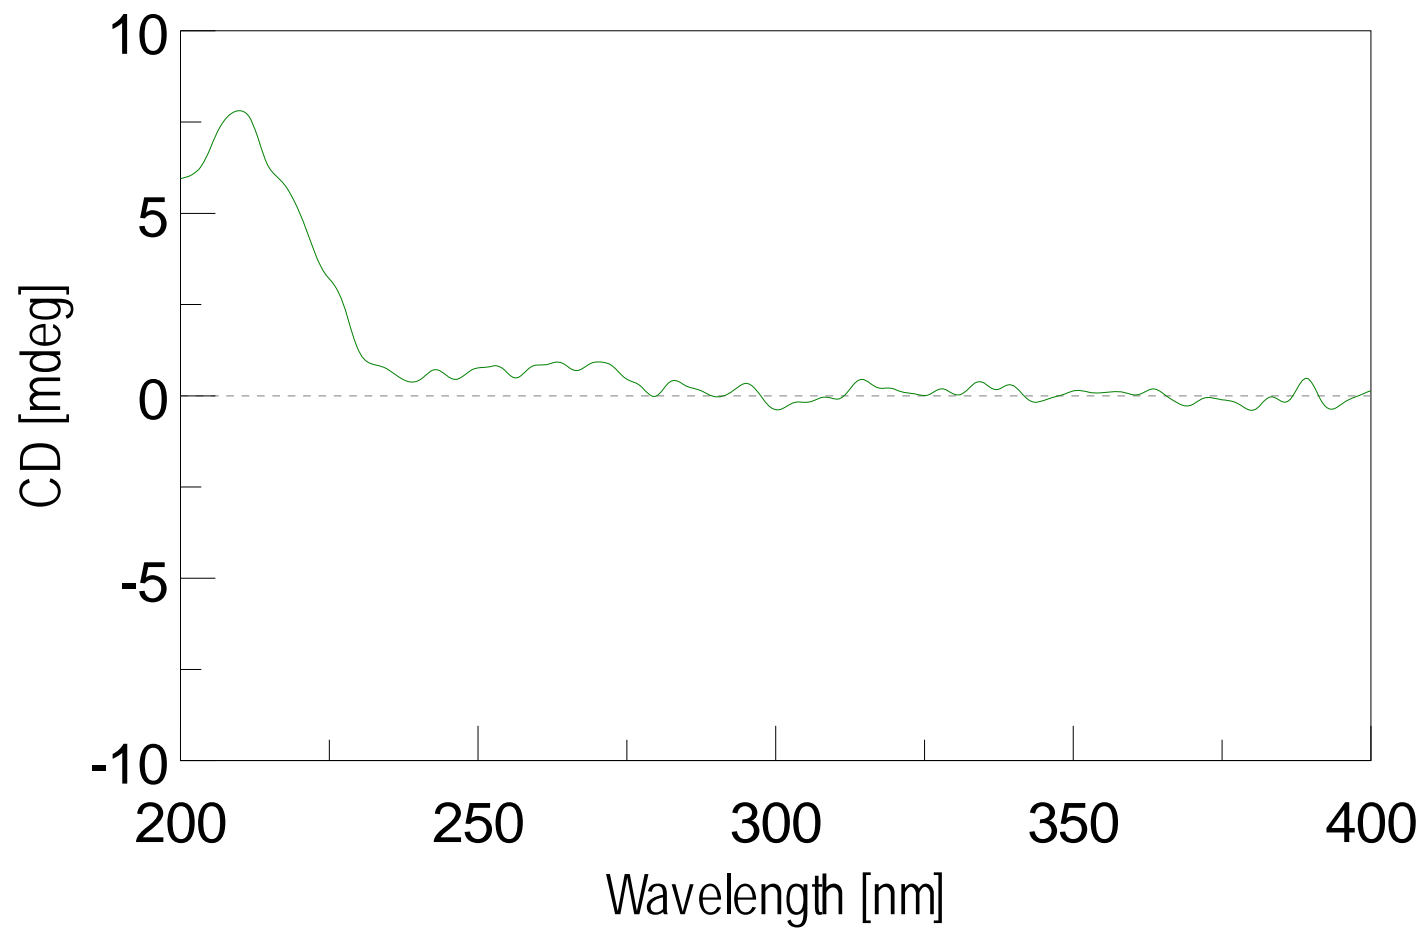

Figure S27. HRESI mass spectrum of compound 4;

20180710-MA299-46\_180710133327 #50 RT: 0.40 AV: 1 NL: 5.83E7  
T: FTMS + p ESI Full ms [100.00-1000.00]

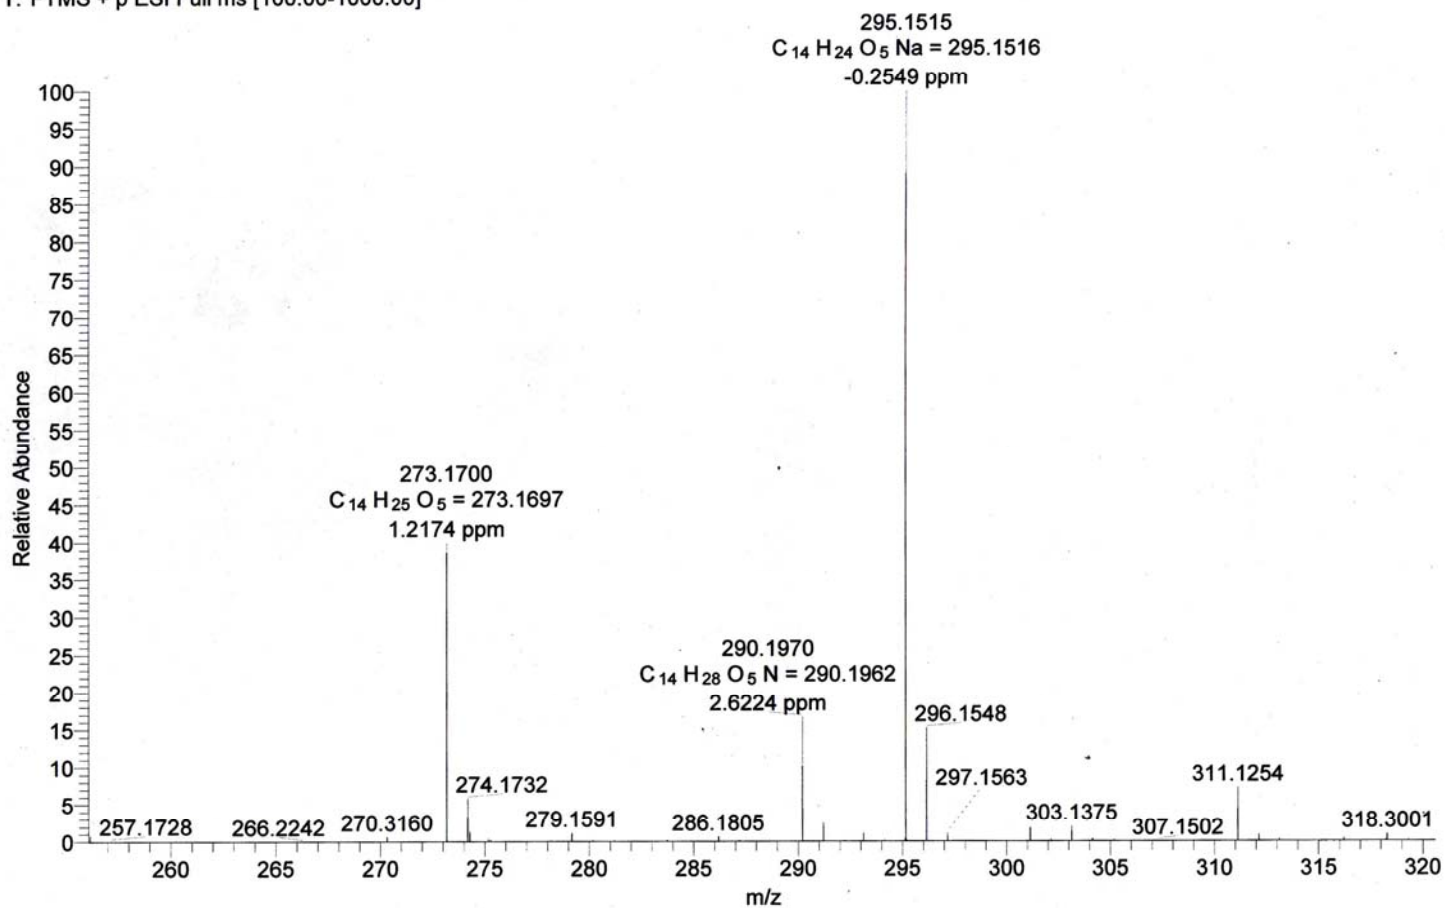

Figure S28.  $^1\text{H}$  NMR (500 MHz,  $\text{DMSO-}d_6$ ) spectrum of compound 4;

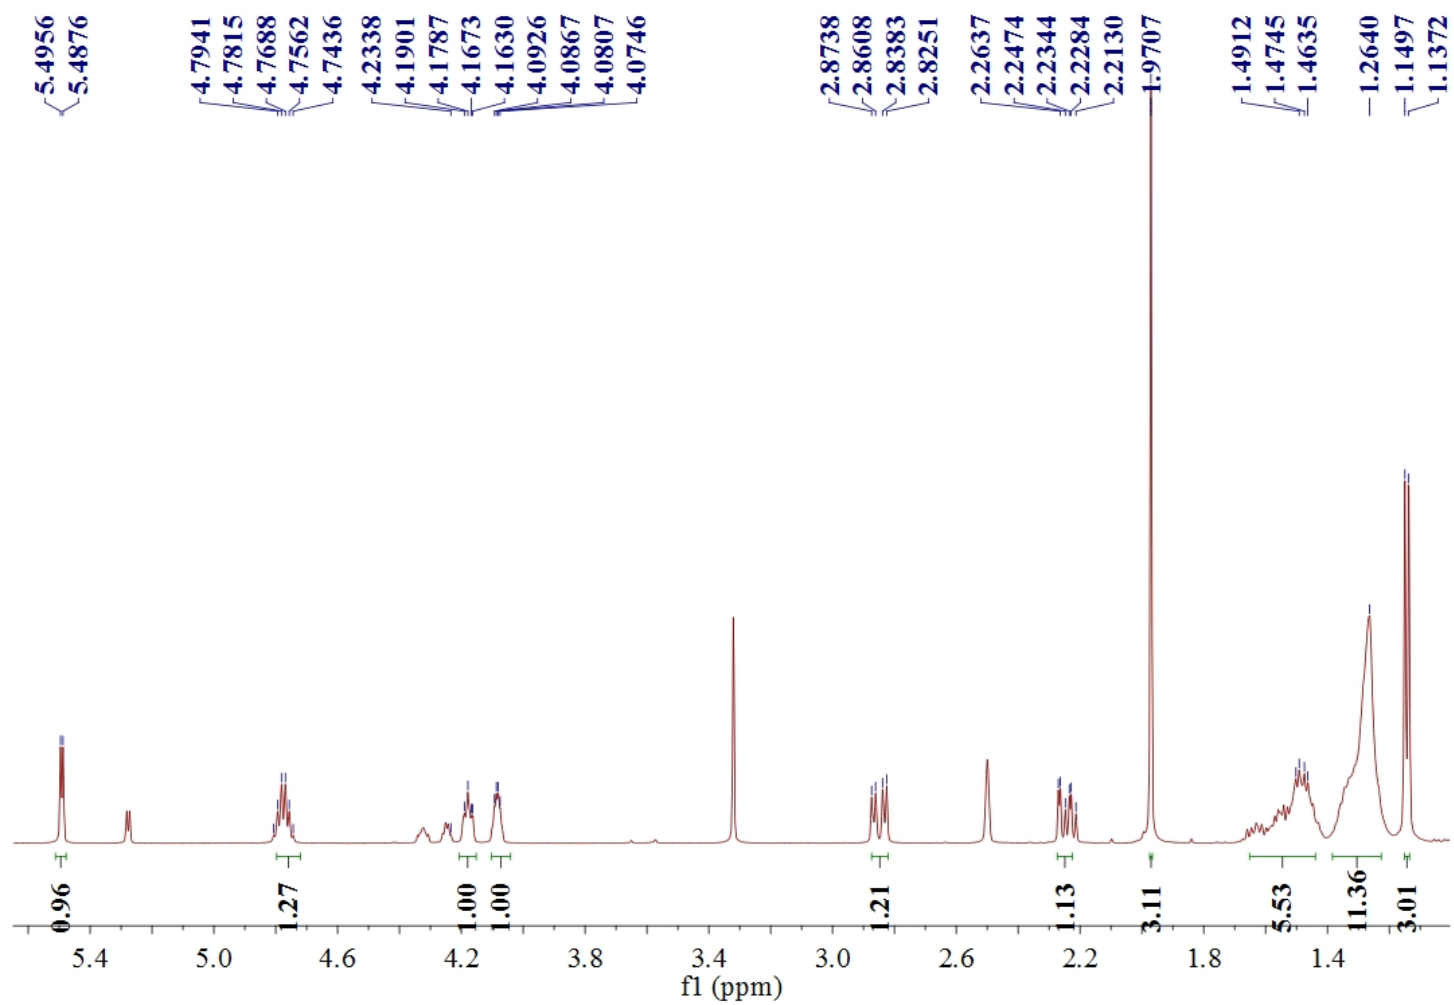

**Figure S29.**  $^{13}\text{C}$  NMR (125 MHz,  $\text{DMSO-}d_6$ ) and DEPT spectra of compound **4**;

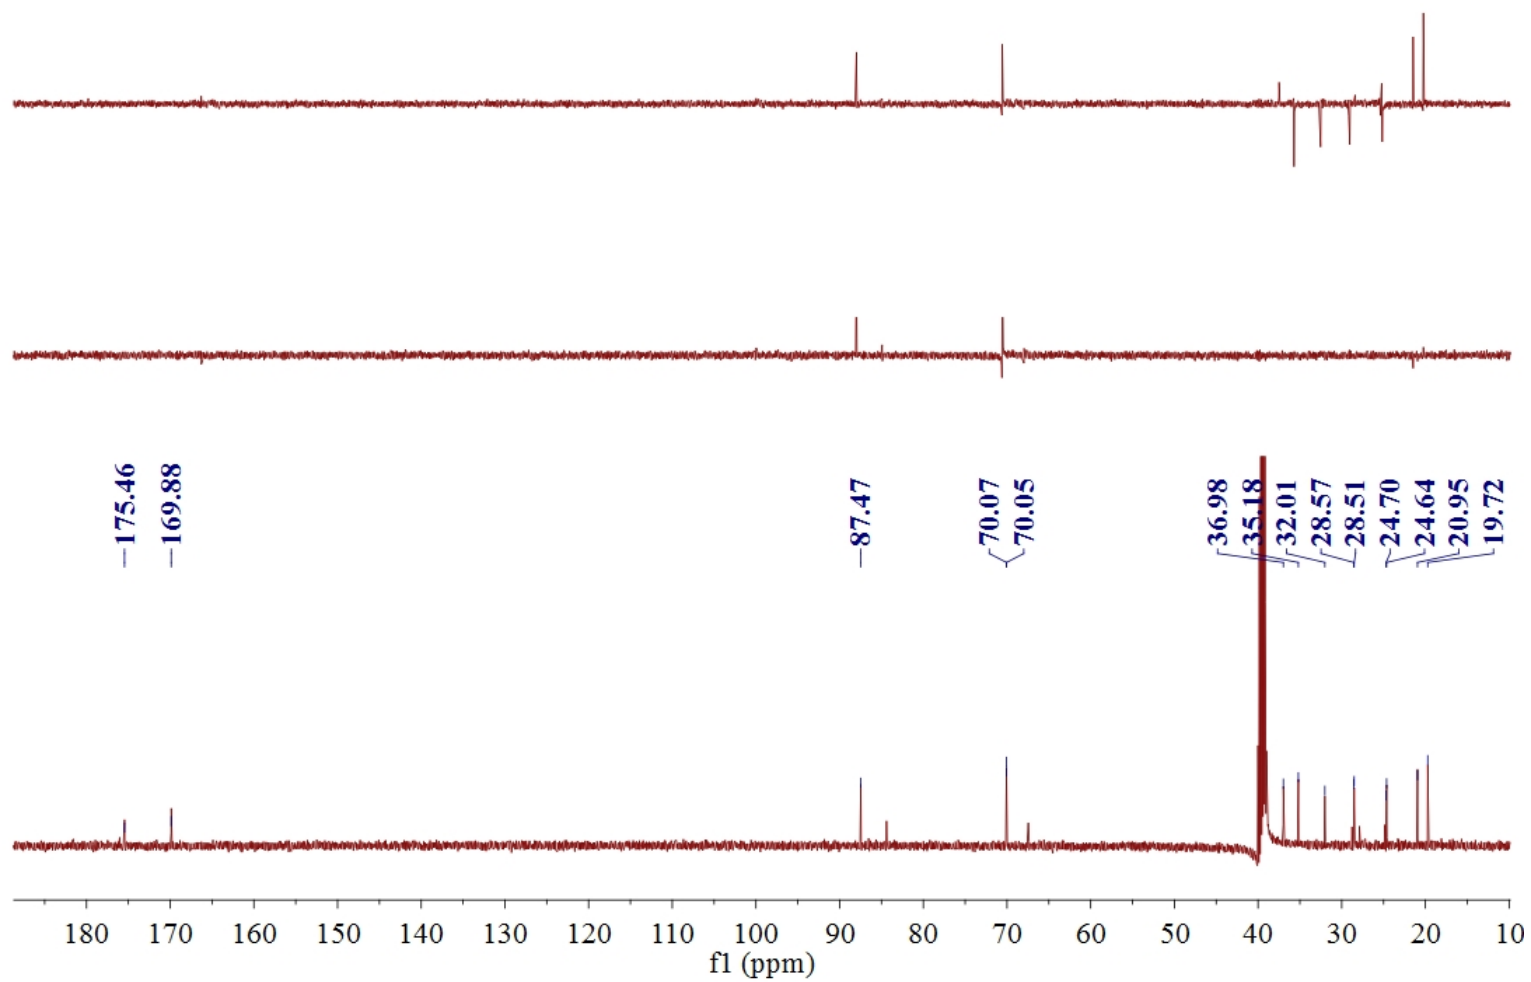





Figure S31. HSQC spectrum of compound 4;

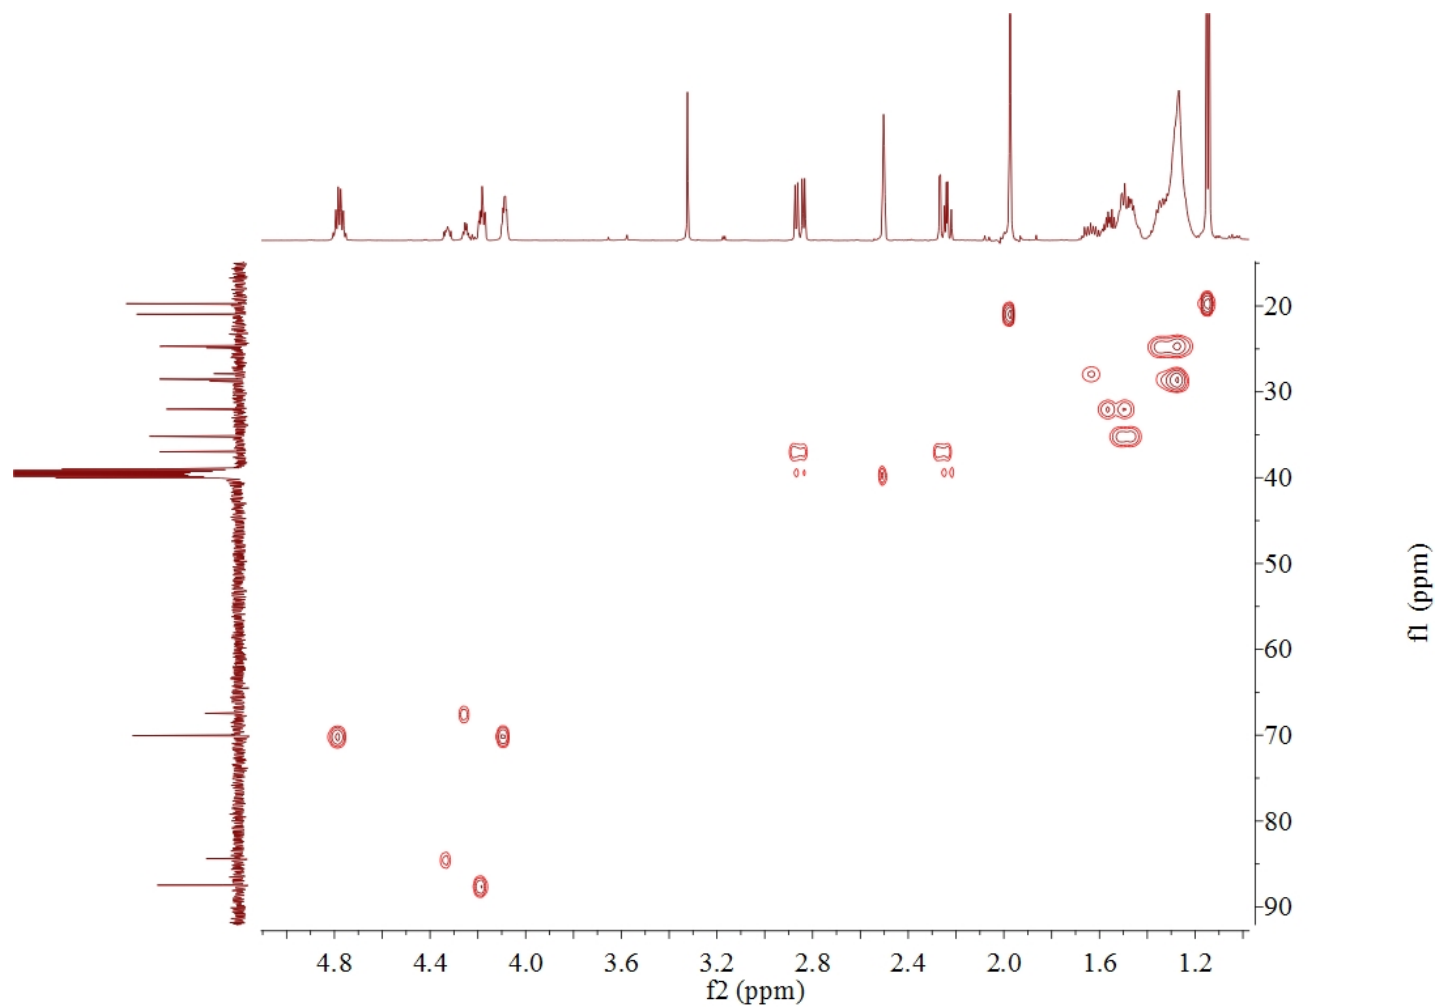

Figure S32. HMBC spectrum of compound 4;

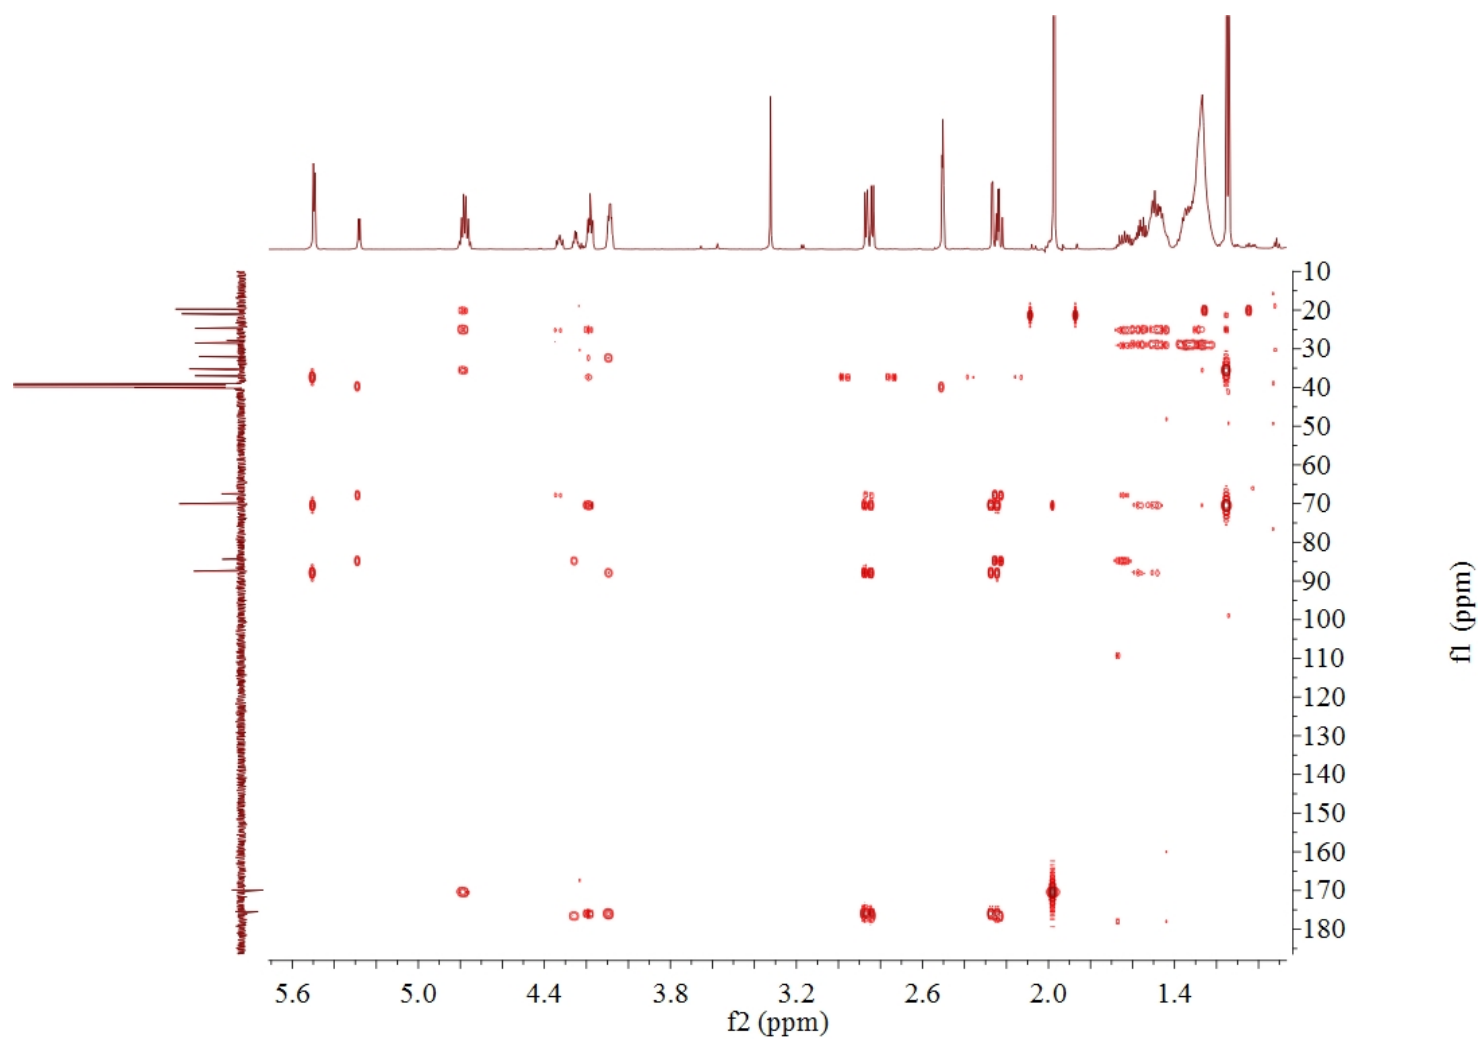

Figure S33. ECD spectrum of compound 4;

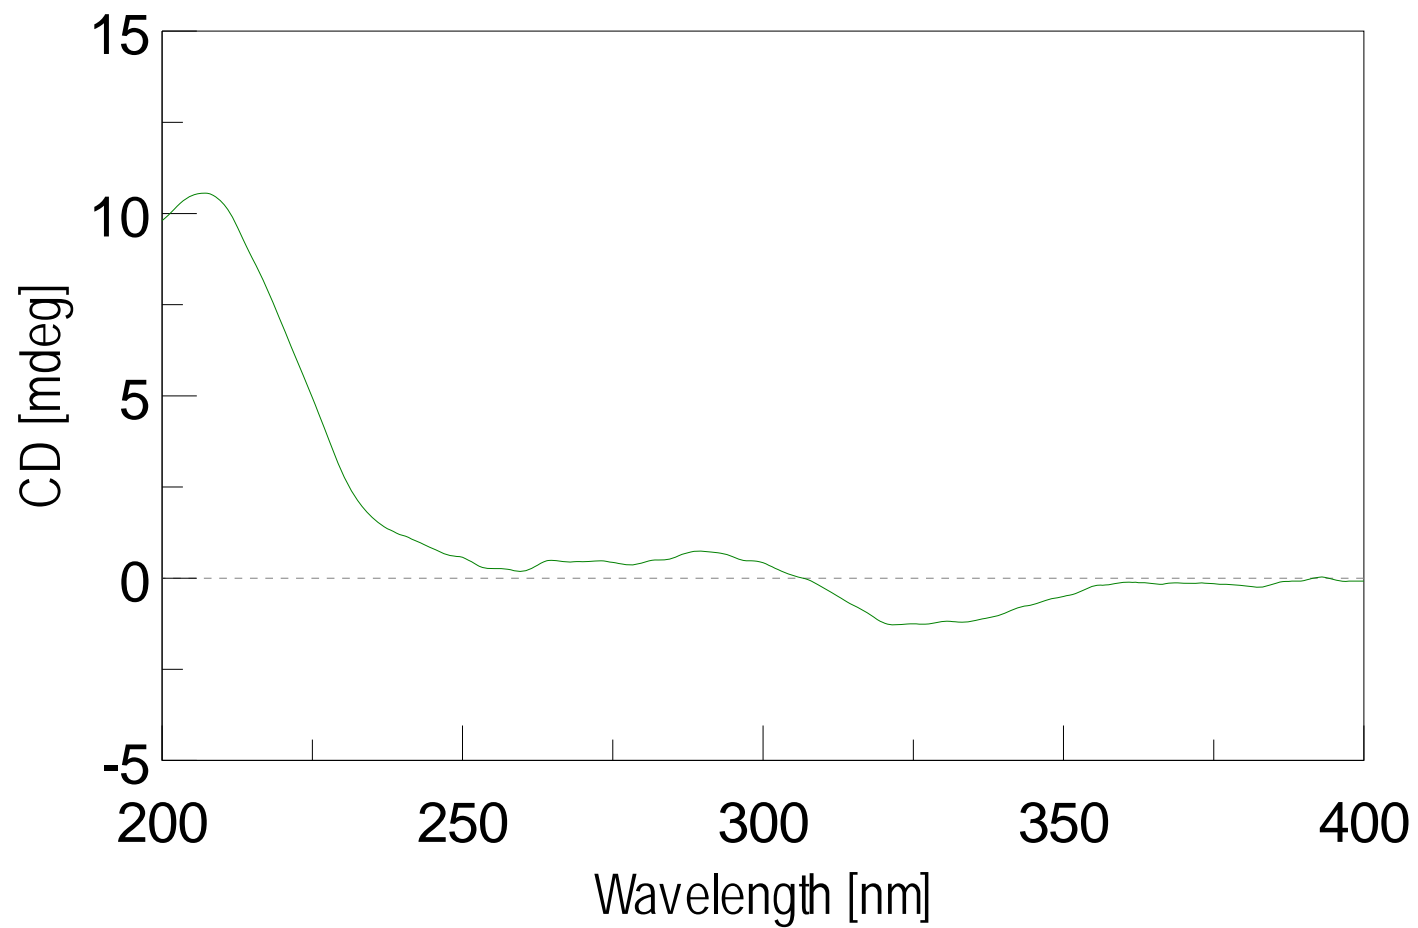

Figure S34. HRESI mass spectrum of compound 5;

20170710-MA299-28\_170710103236 #83-84 RT: 0.72-0.73 AV: 2 NL: 2.03E7  
J: FTMS + p ESI Full ms [50.00-1000.00]

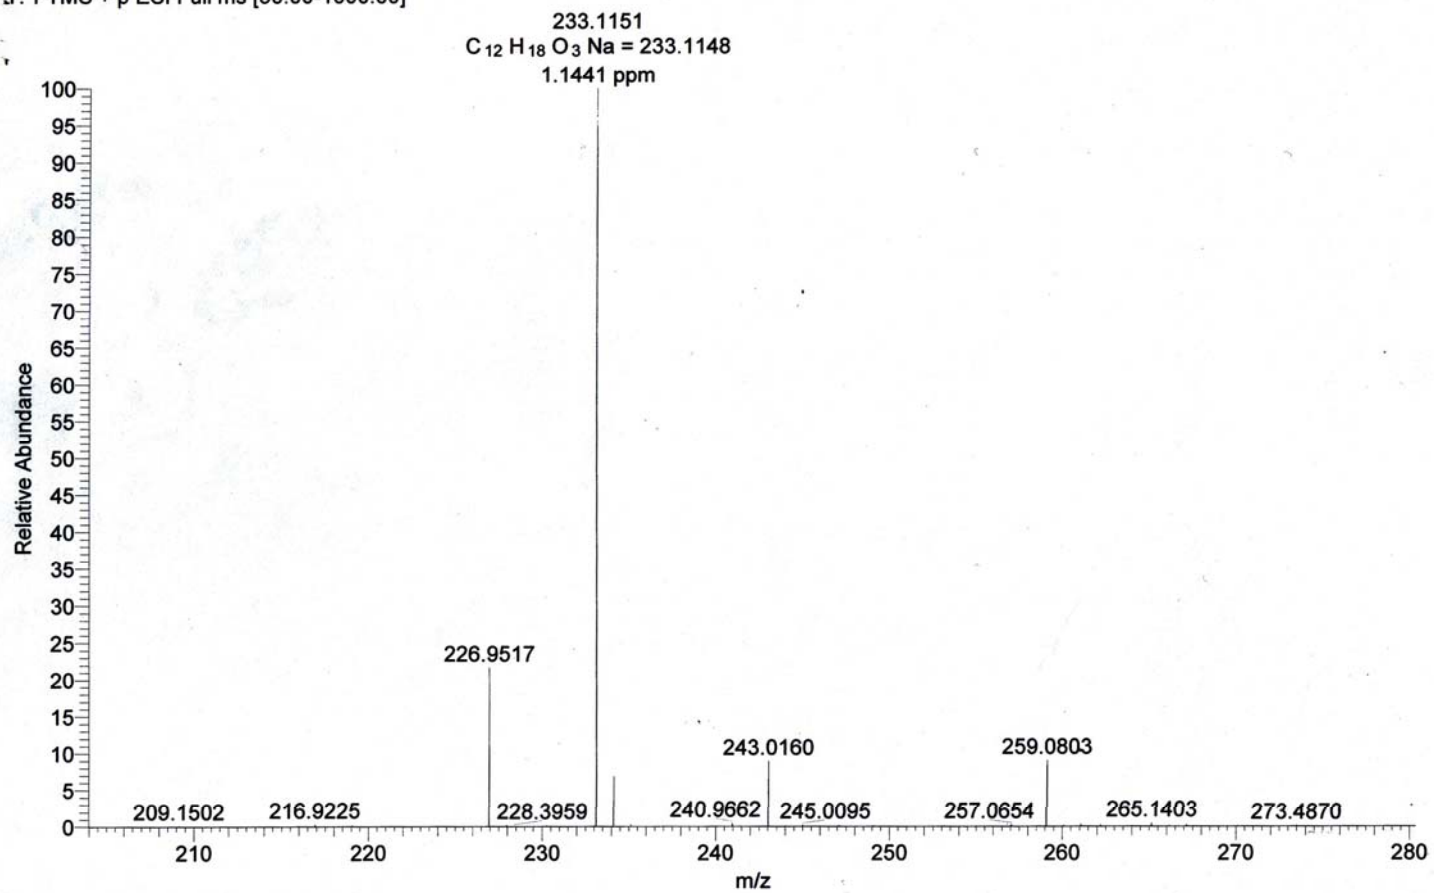

Figure S35.  $^1\text{H}$  NMR (500 MHz,  $\text{DMSO-}d_6$ ) spectrum of compound 5;

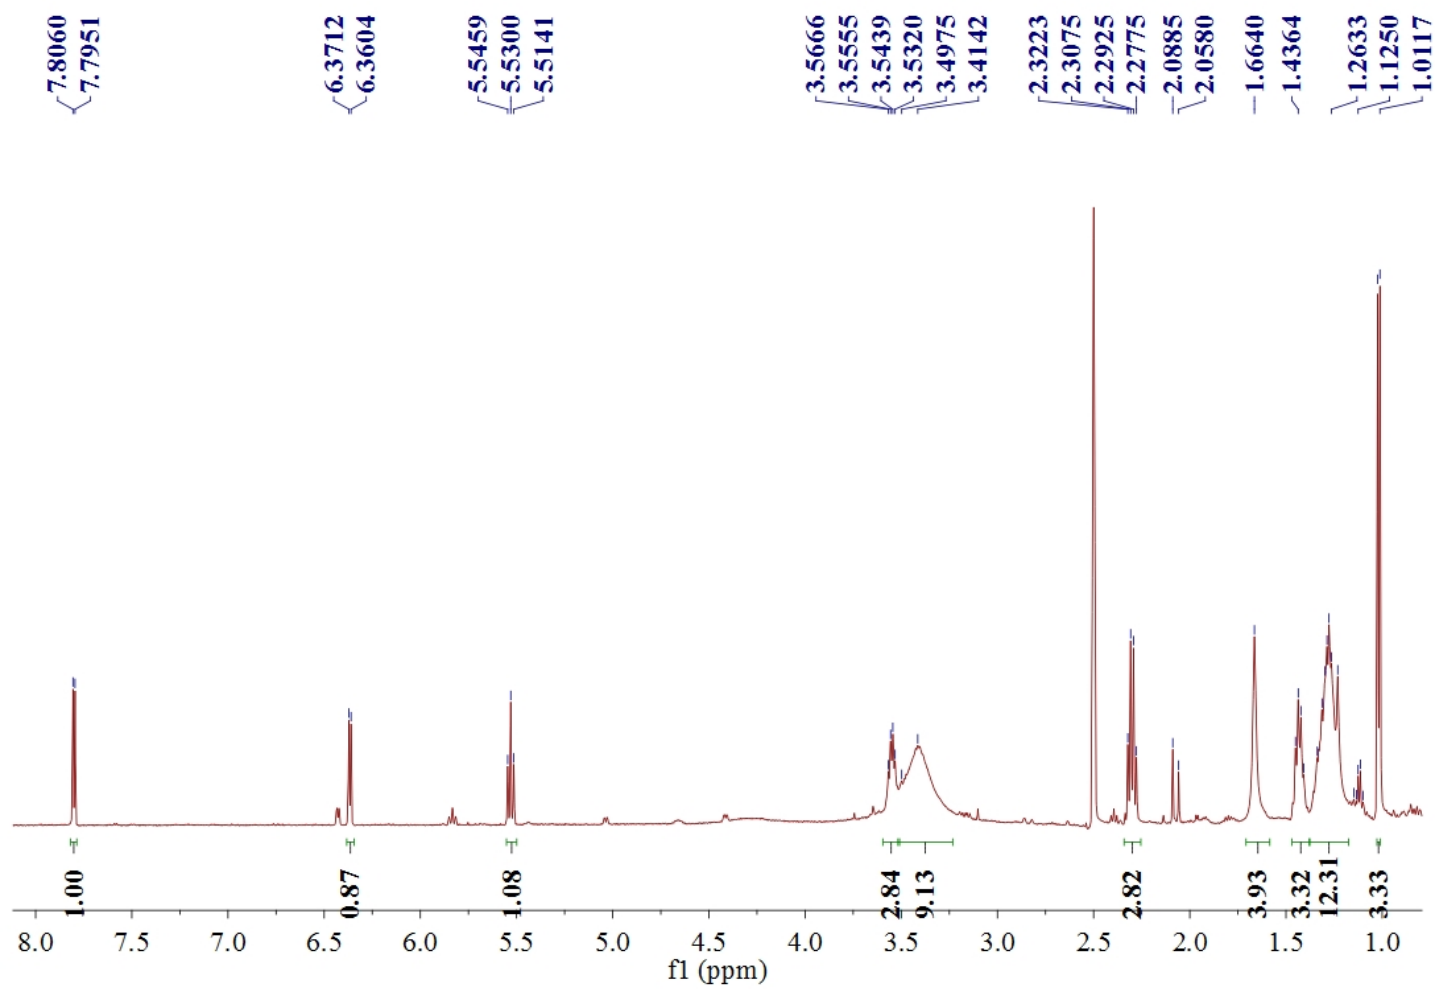

Figure S36.  $^{13}\text{C}$  NMR (125 MHz,  $\text{DMSO-}d_6$ ) and DEPT spectra of compound **5**;

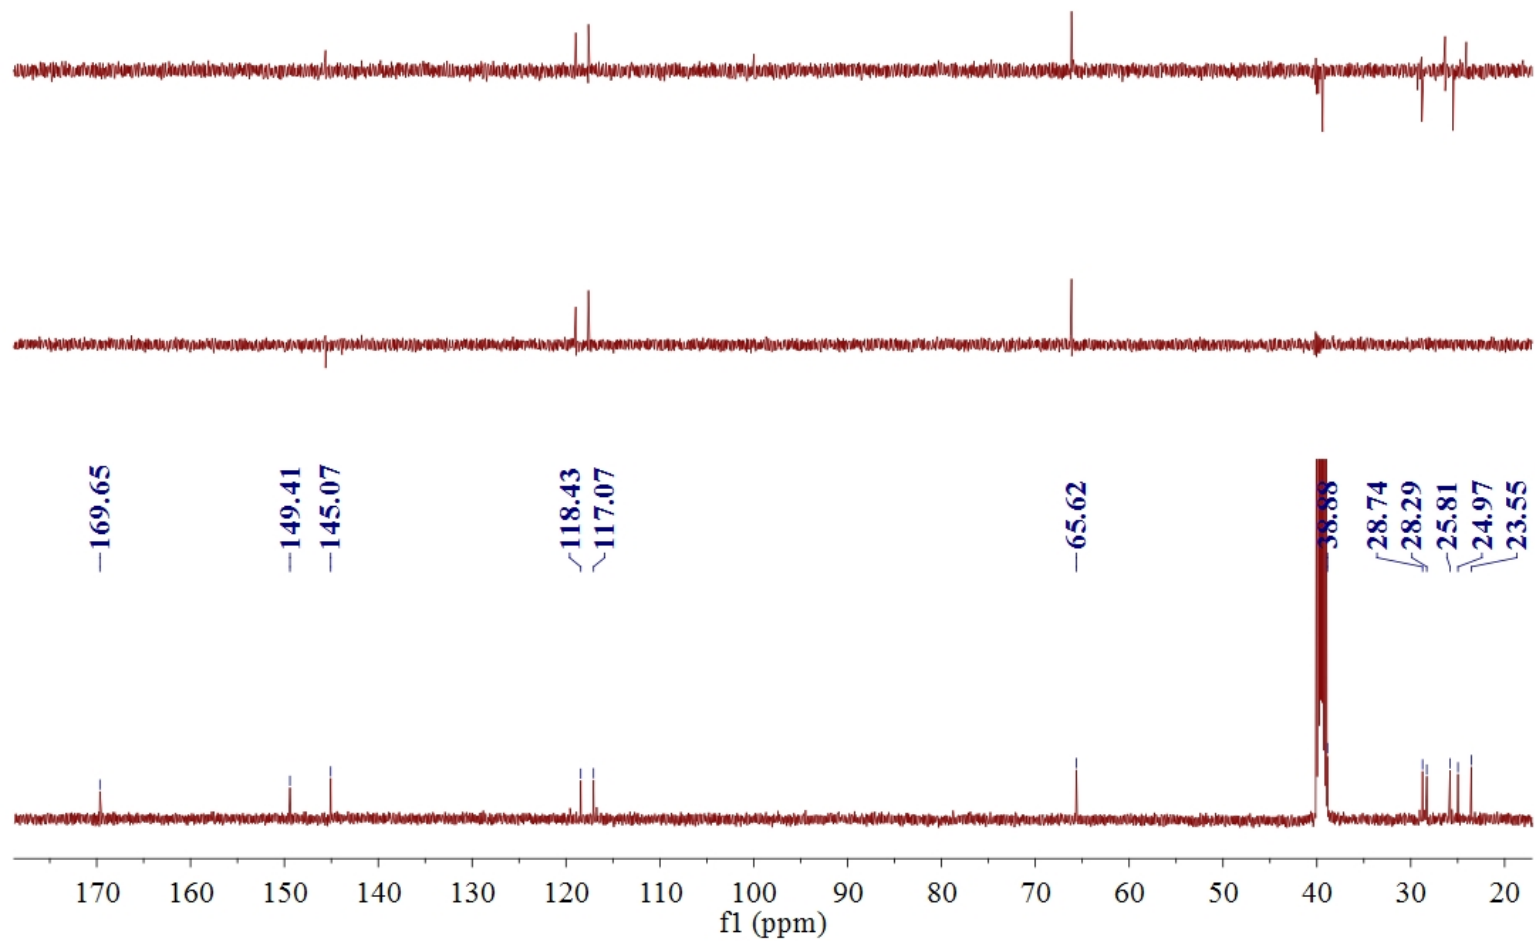

Figure S37. COSY spectrum of compound 5;

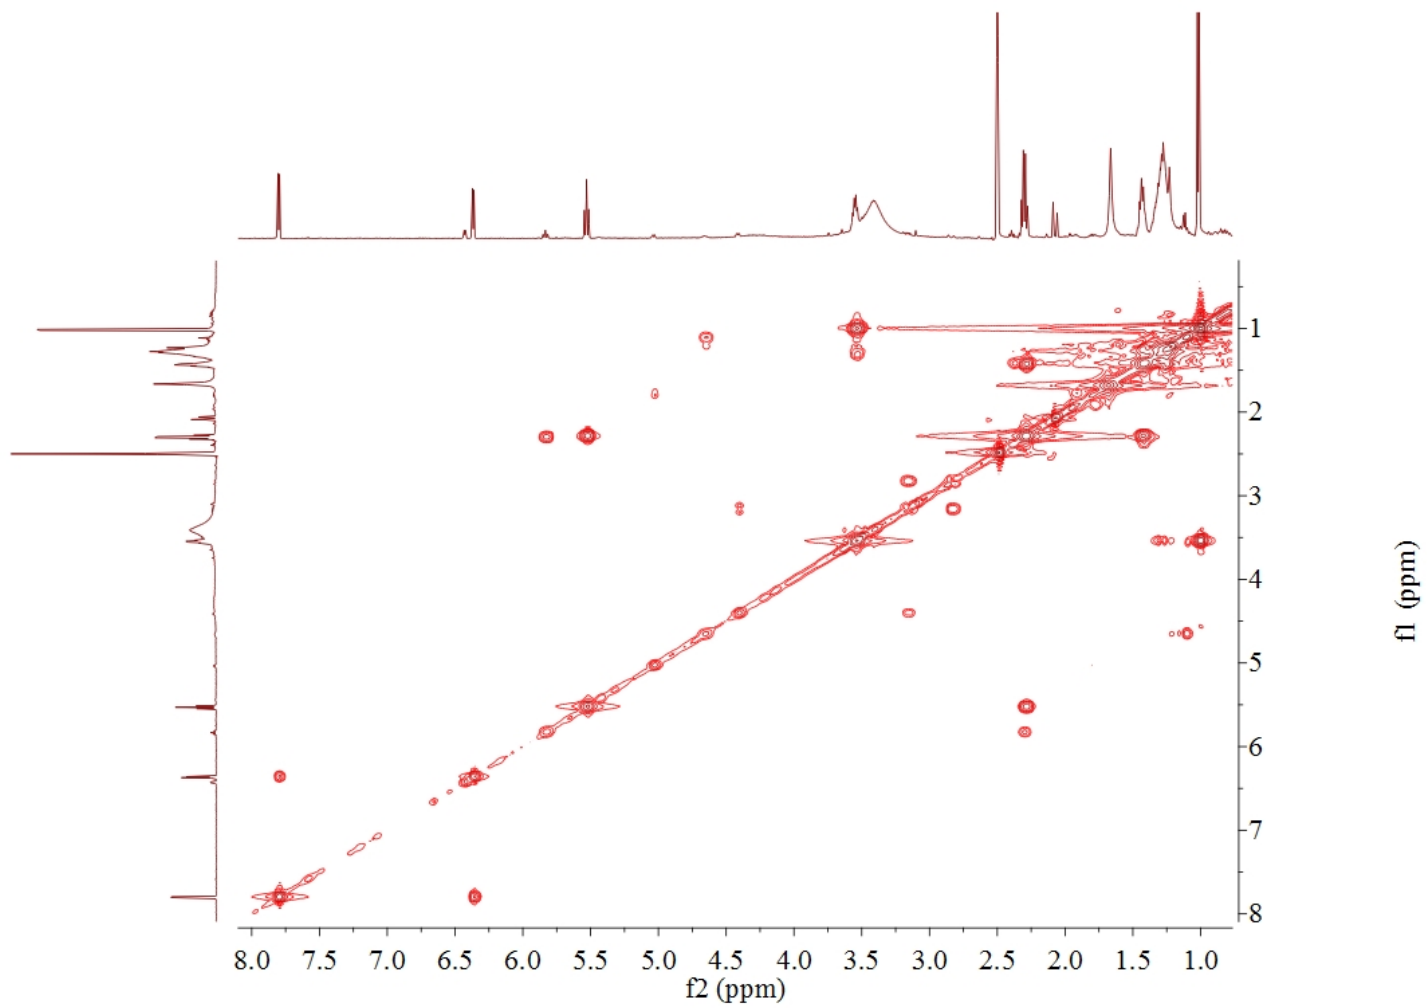



**Figure S38.** HSQC spectrum of compound **5**;

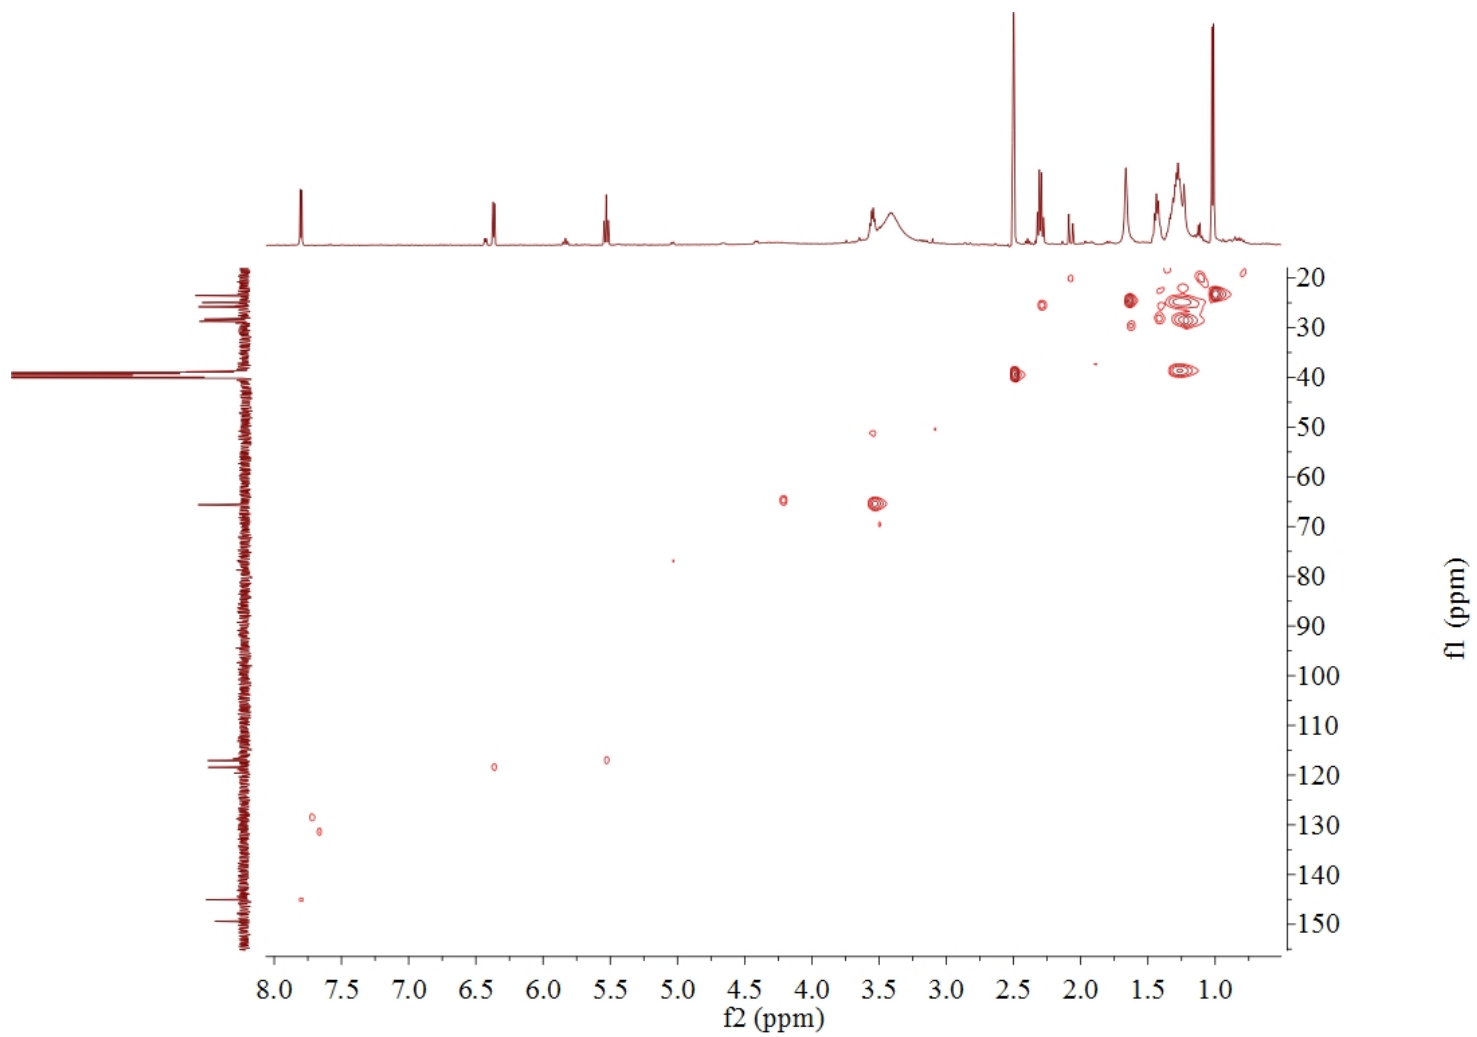

Figure S39. HMBC spectrum of compound 5;

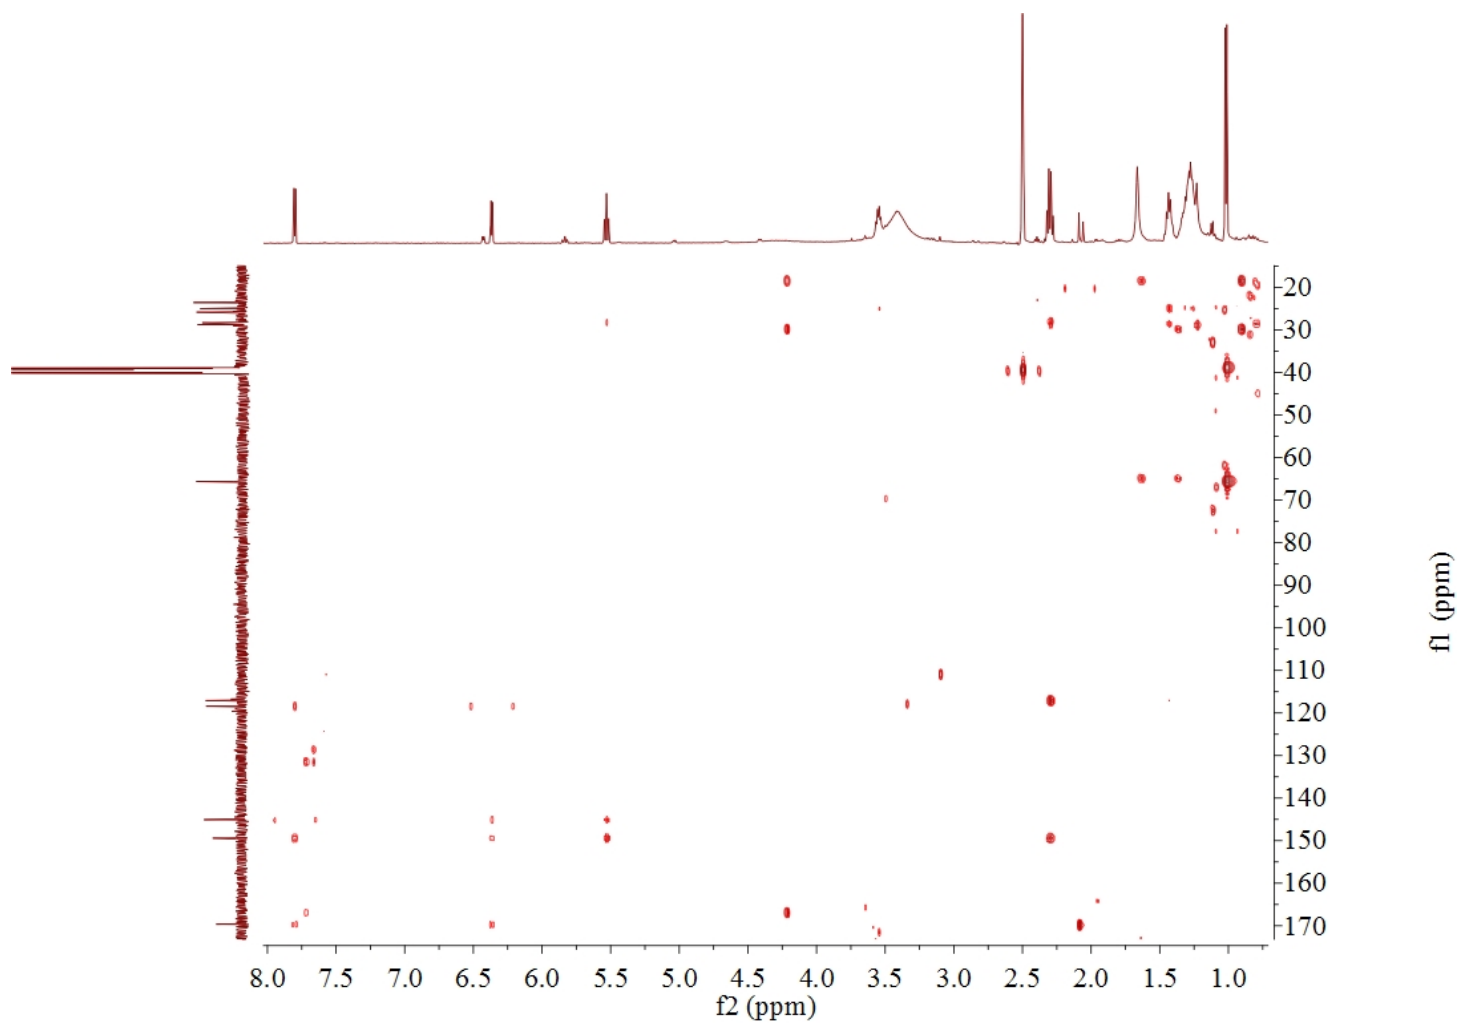

**Figure S40.** NOESY spectrum of compound **5**;

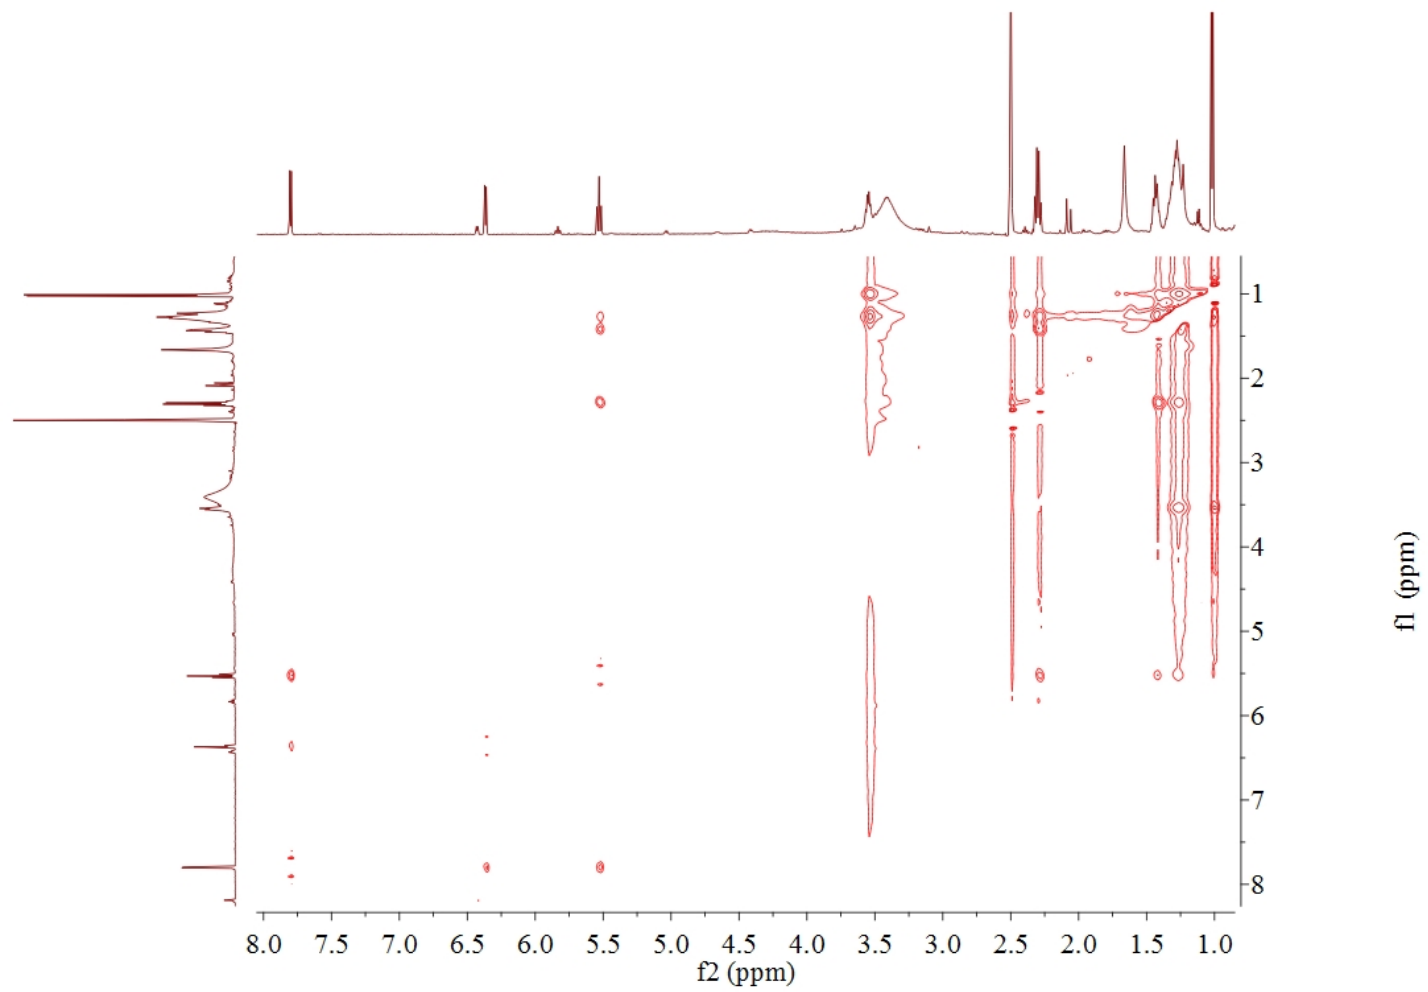

**Figure S41.** HRESI mass spectrum of compound **6**;

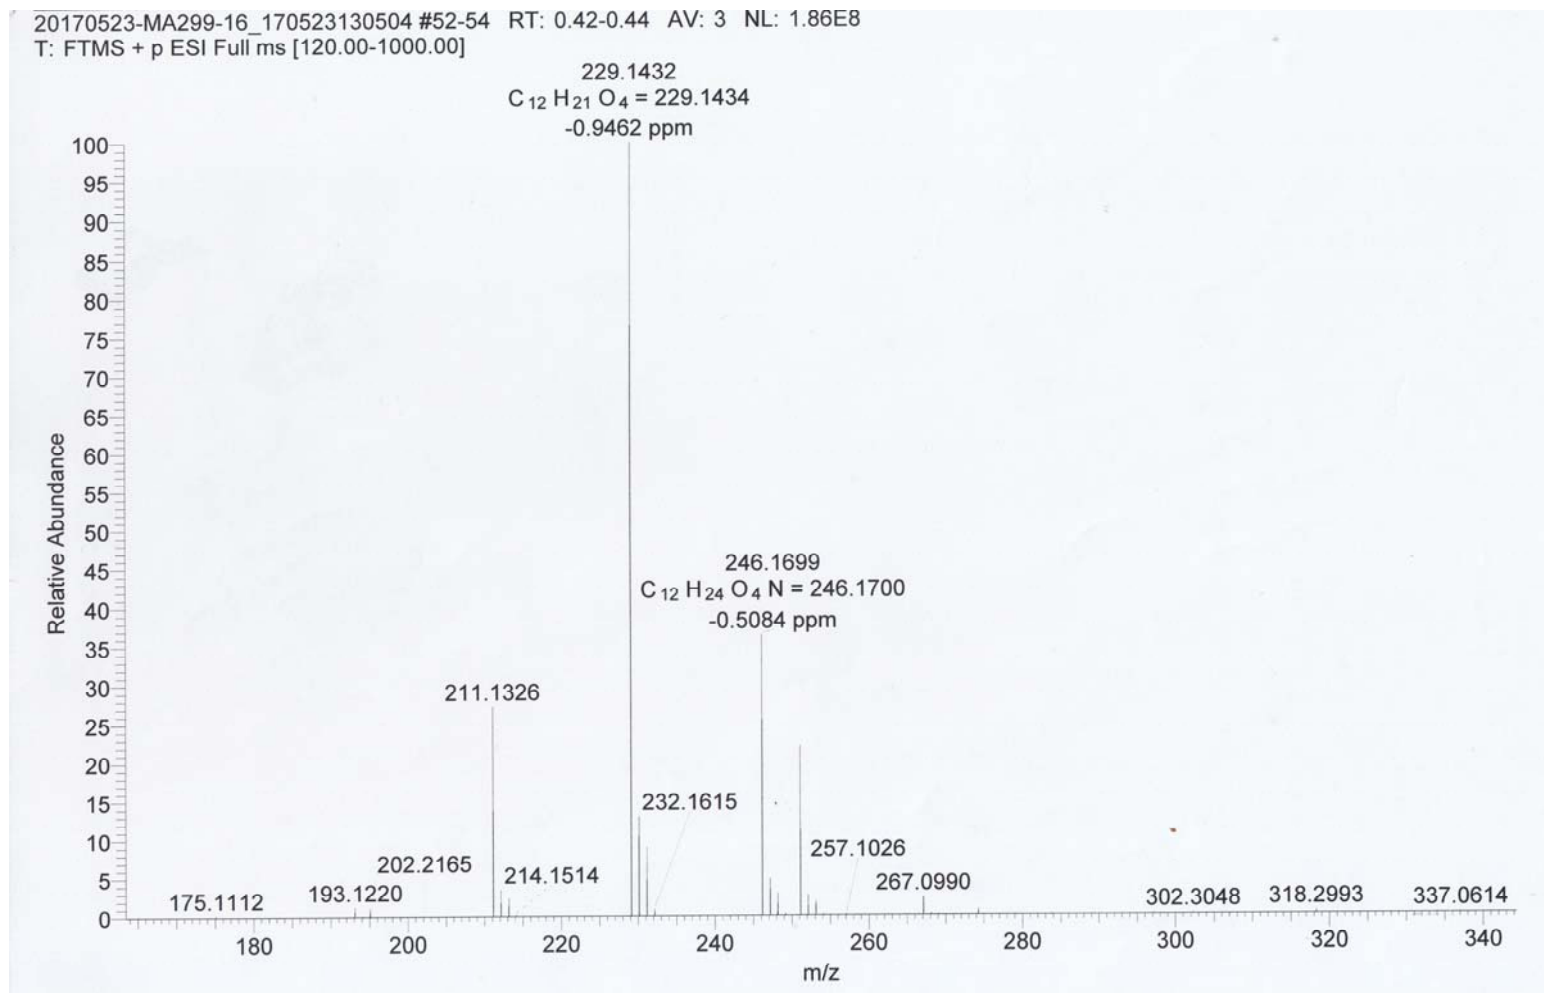

Figure S42.  $^1\text{H}$  NMR (500 MHz,  $\text{DMSO-}d_6$ ) spectrum of compound 6;

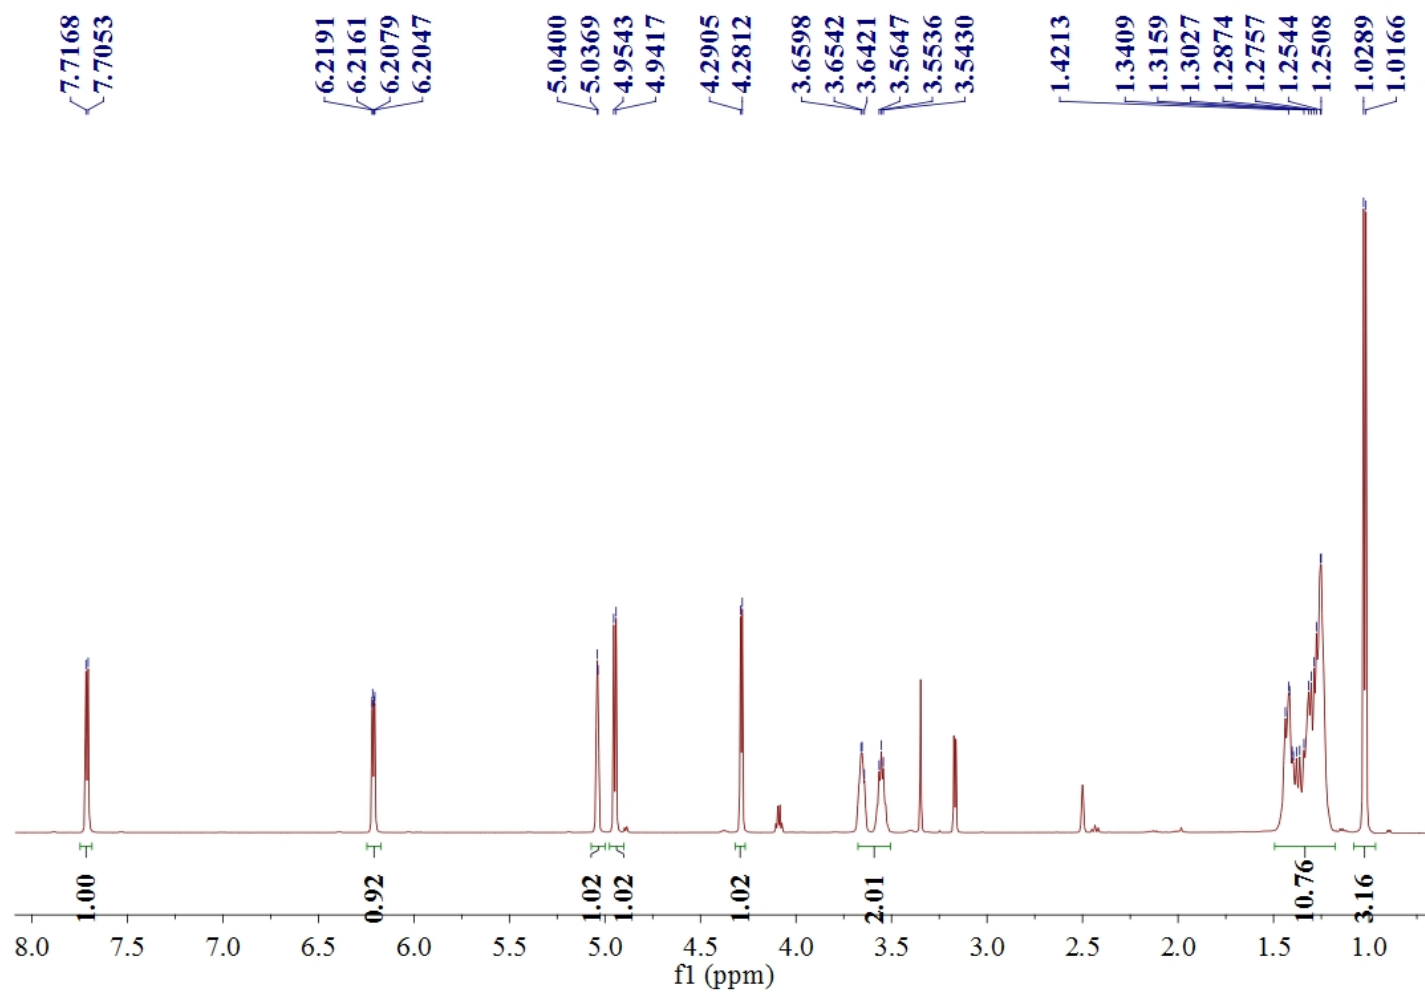

**Figure S43.**  $^{13}\text{C}$  NMR (125 MHz,  $\text{DMSO-}d_6$ ) and DEPT spectra of compound **6**;

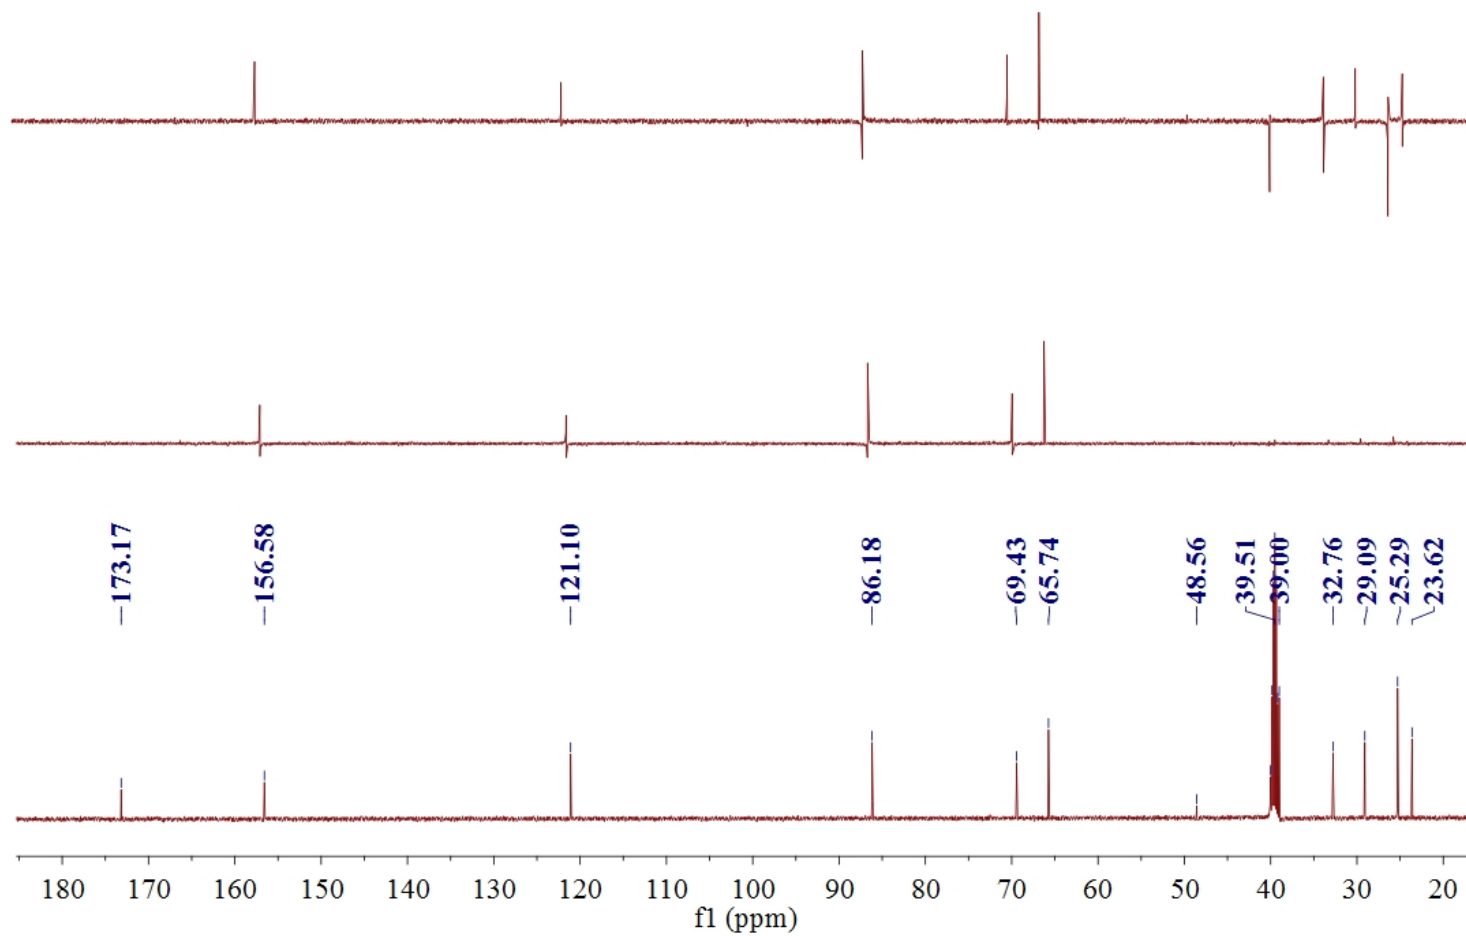

**Figure S44.** COSY spectrum of compound **6**;

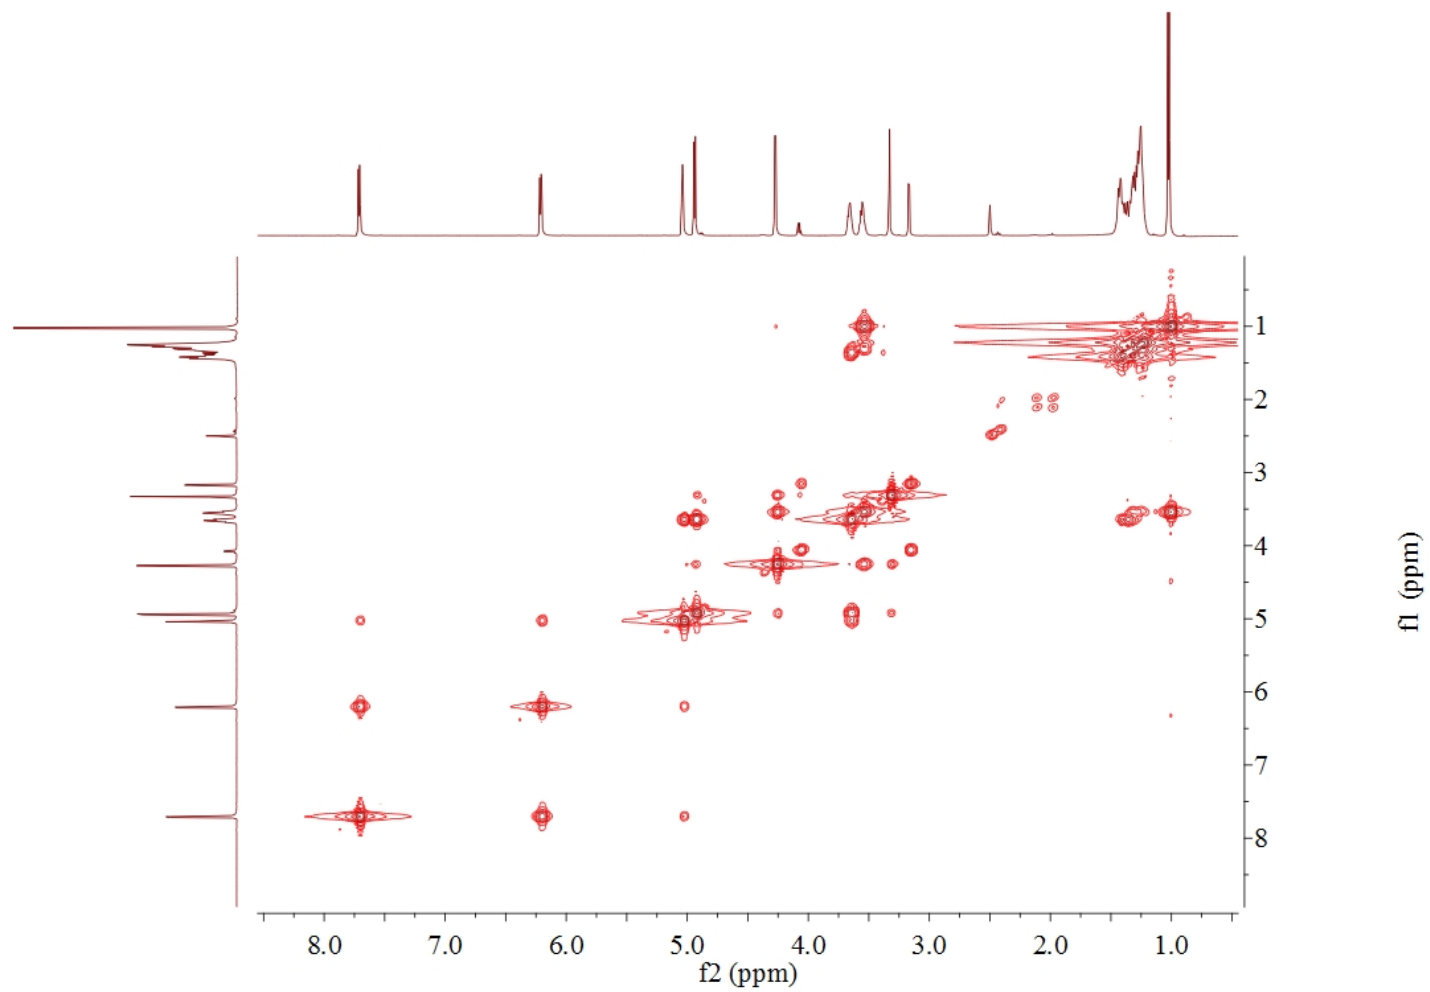

Figure S45. HMBC spectrum of compound **6**;

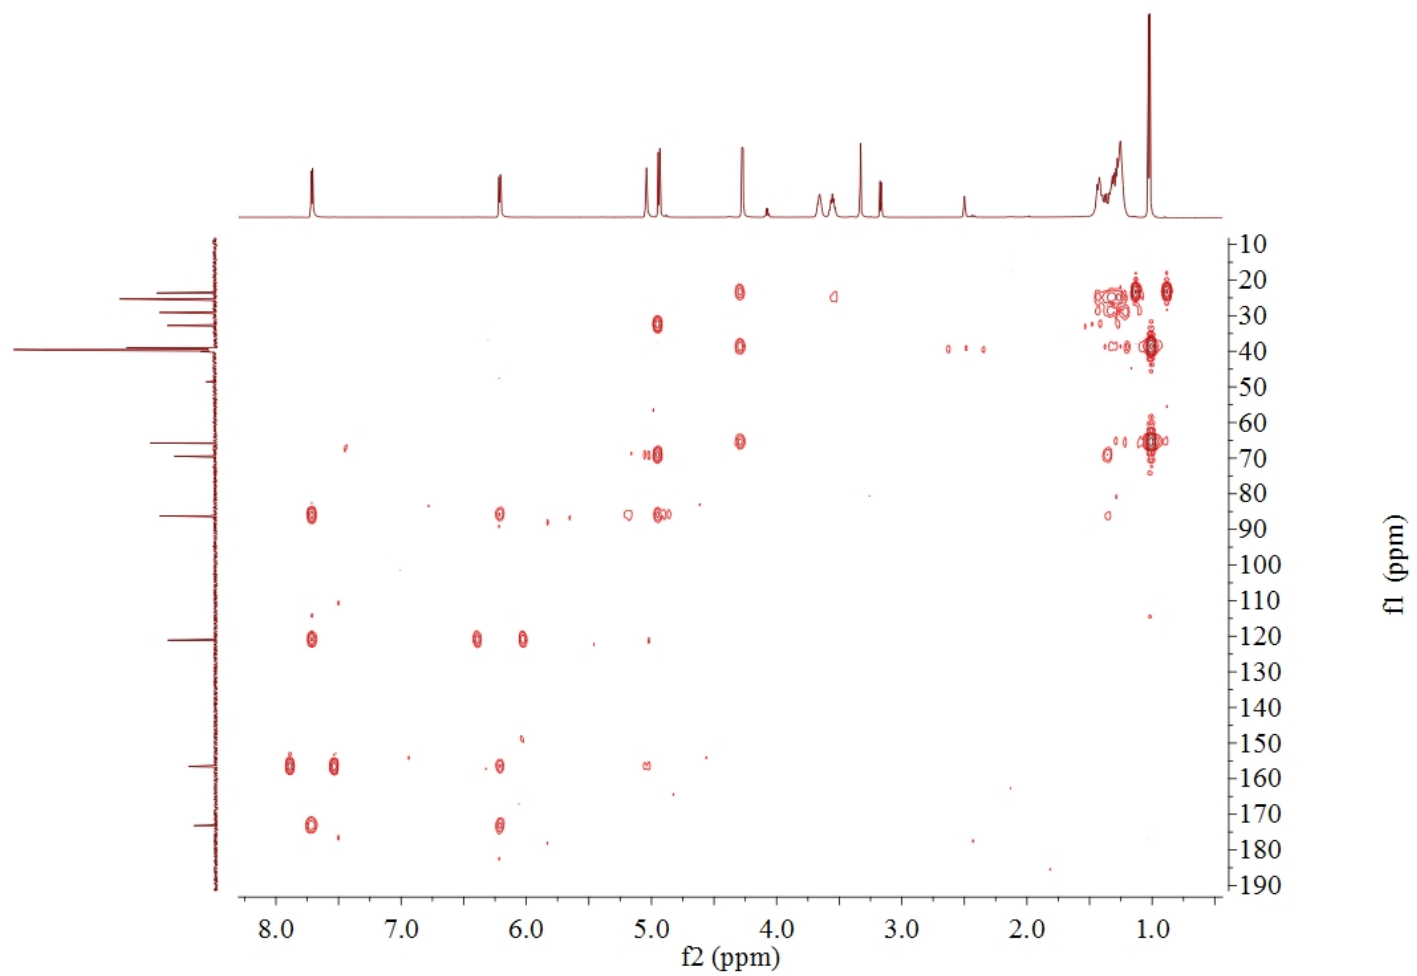



**Figure S46.** Crystal packing of compound **3**;

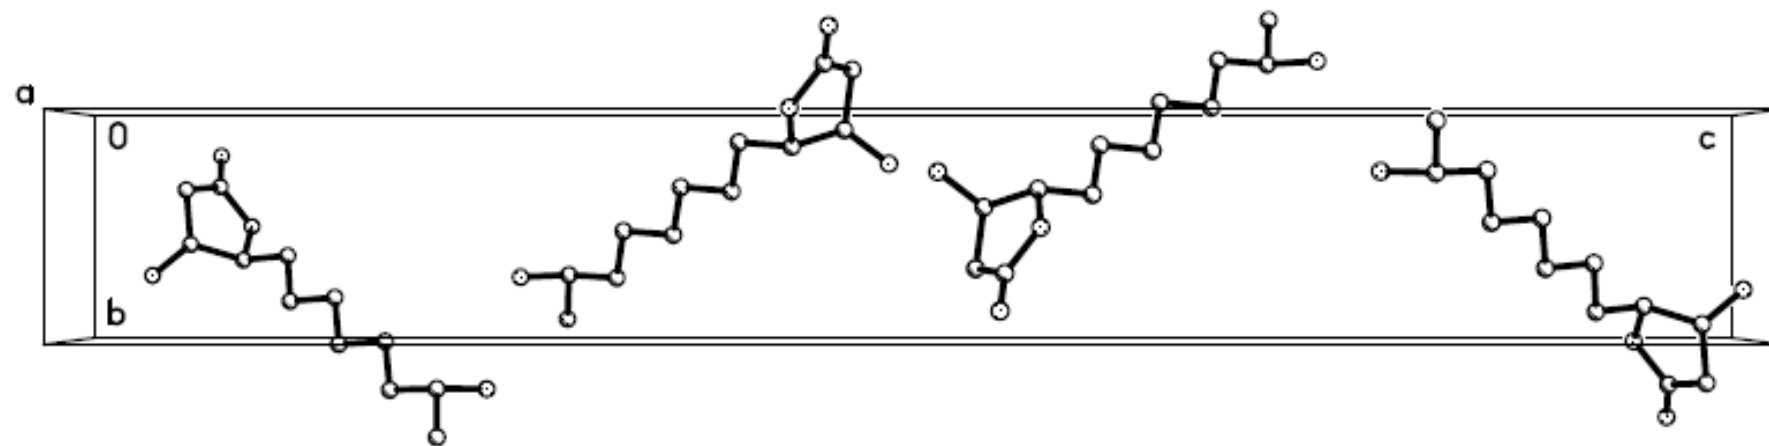

**Figure S47.** Crystal packing of compound **6**.

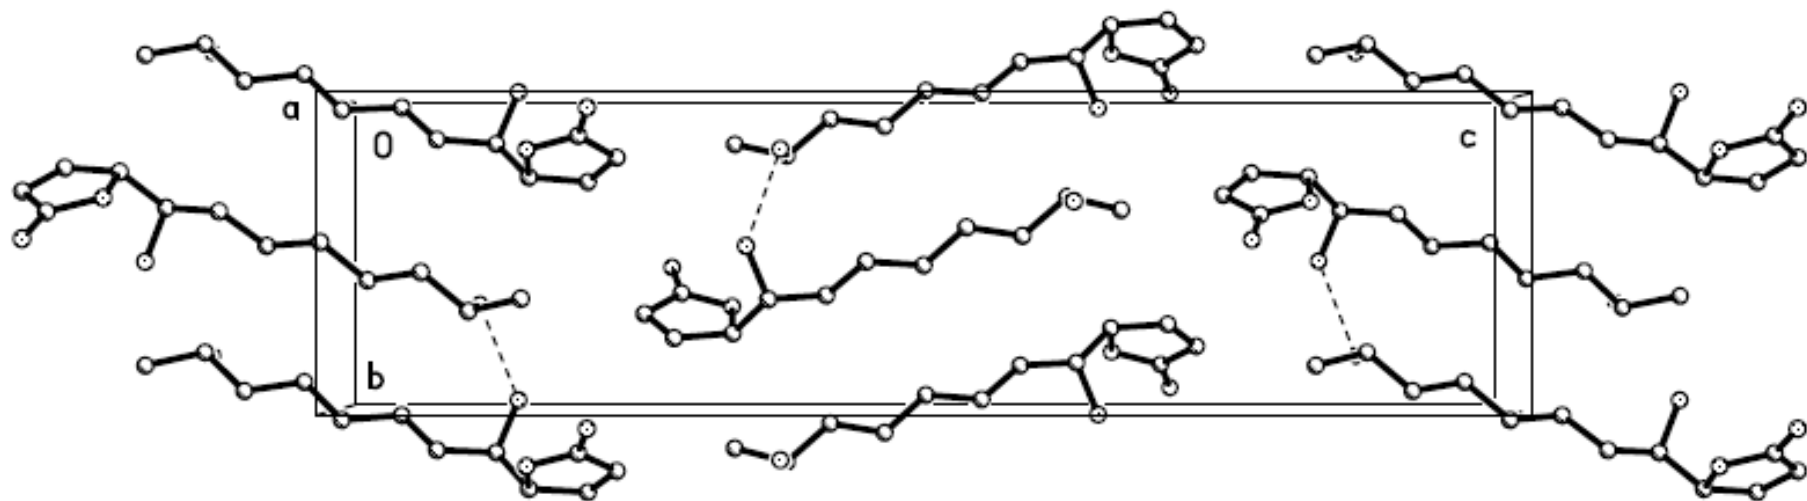

Supplement: marinedrugs-17-00296-s001.pdf [file marinedrugs-17-00296-s001.pdf]
